# Supplementary material for: Attenuation of the AMPK–ACC–MCoA negative feedback on CPT1 leads to PASMC hyperproliferation in PAH
Source: Research Square preprint supplement (doi:10.21203/rs.3.rs-7888313/v1), 2026-02-17
Supplement: Supplementary file 1 [file 50426d82d3a71879e7d060d5.docx]

| Cropped blots in manuscript (Fig. 2 a) |
| --- |
| 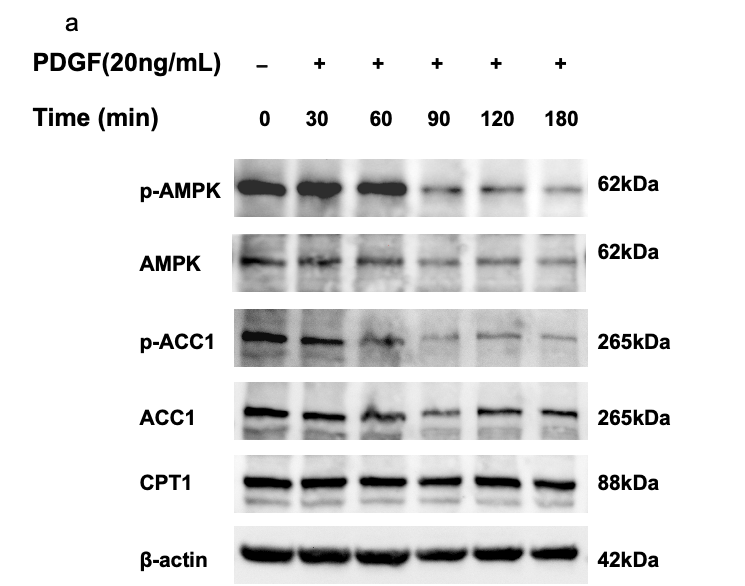 |

| Original blots in supplementary information (Fig. 2 a) |
| --- |
| 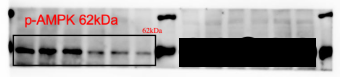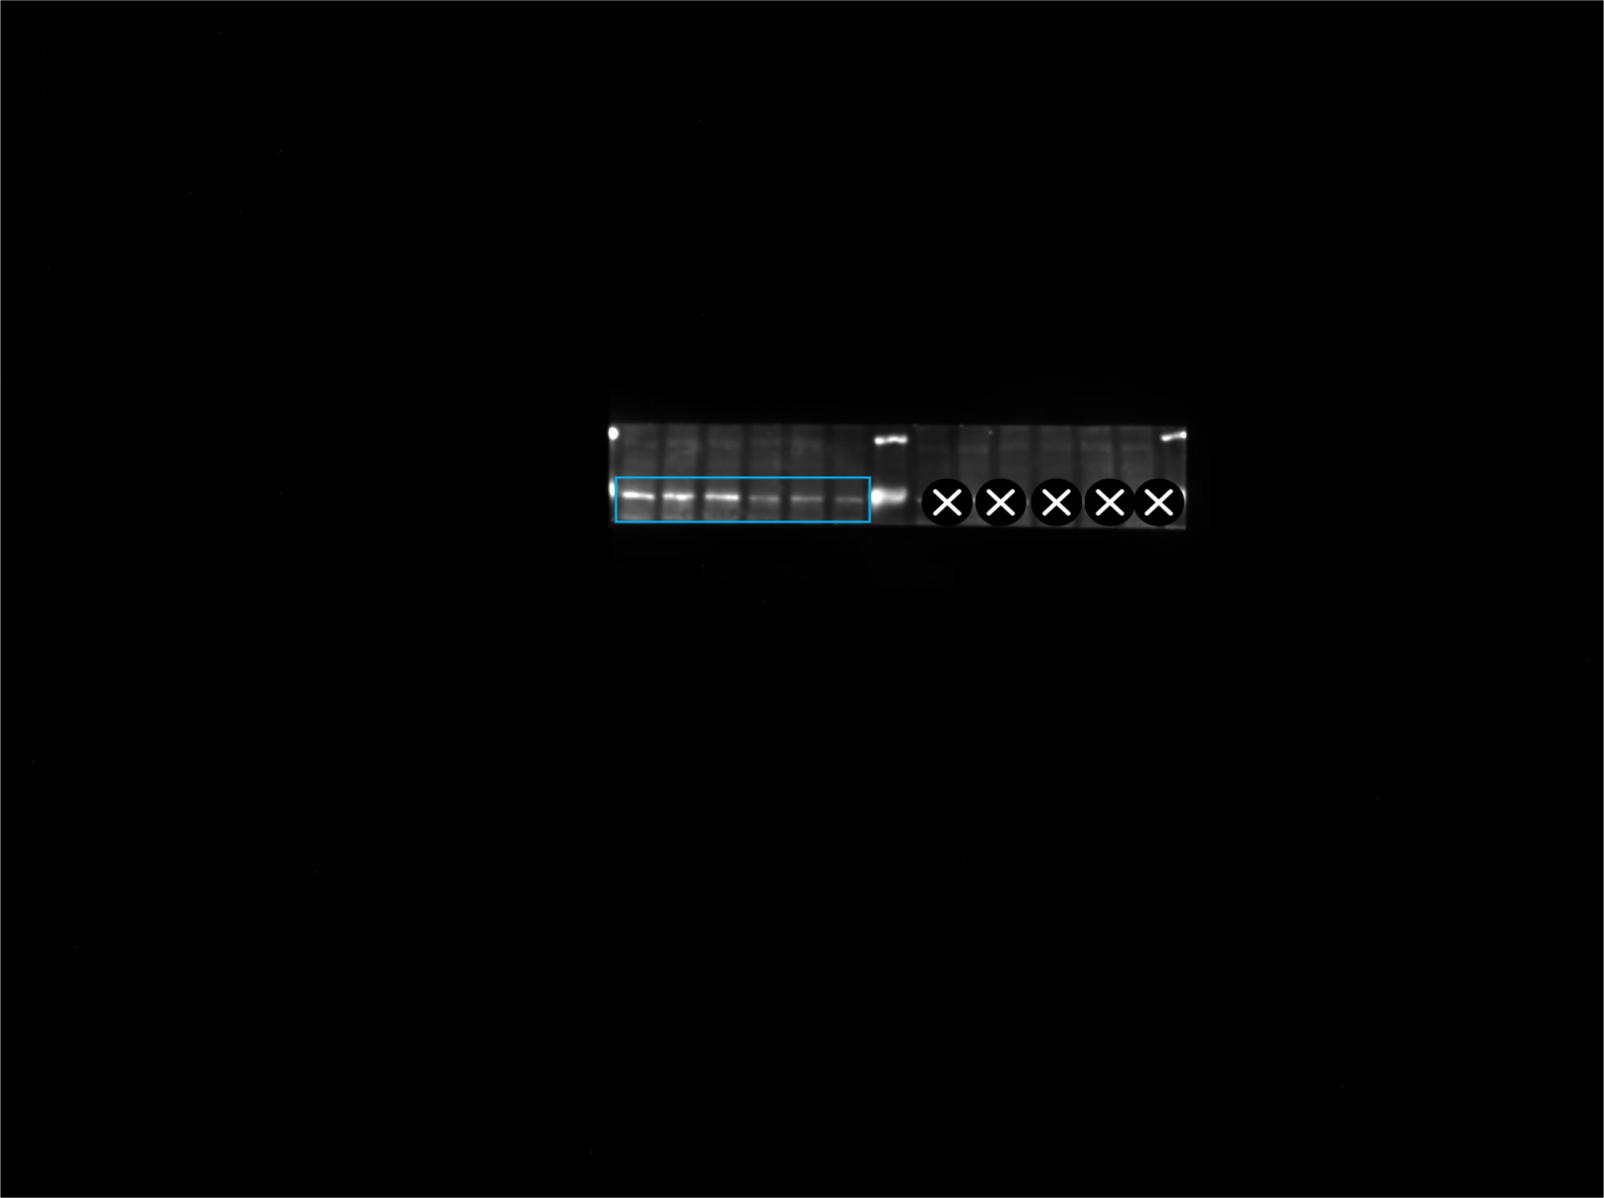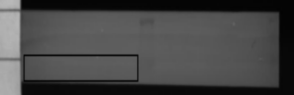  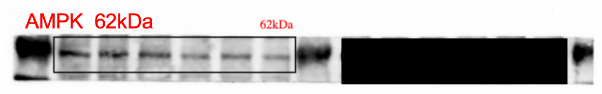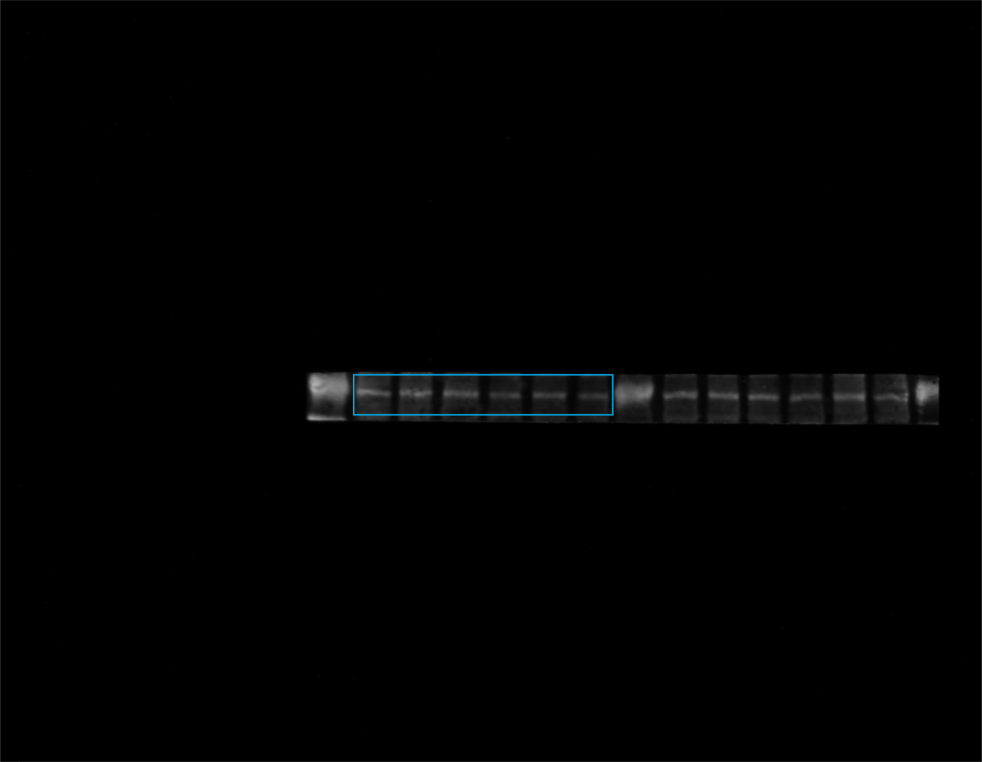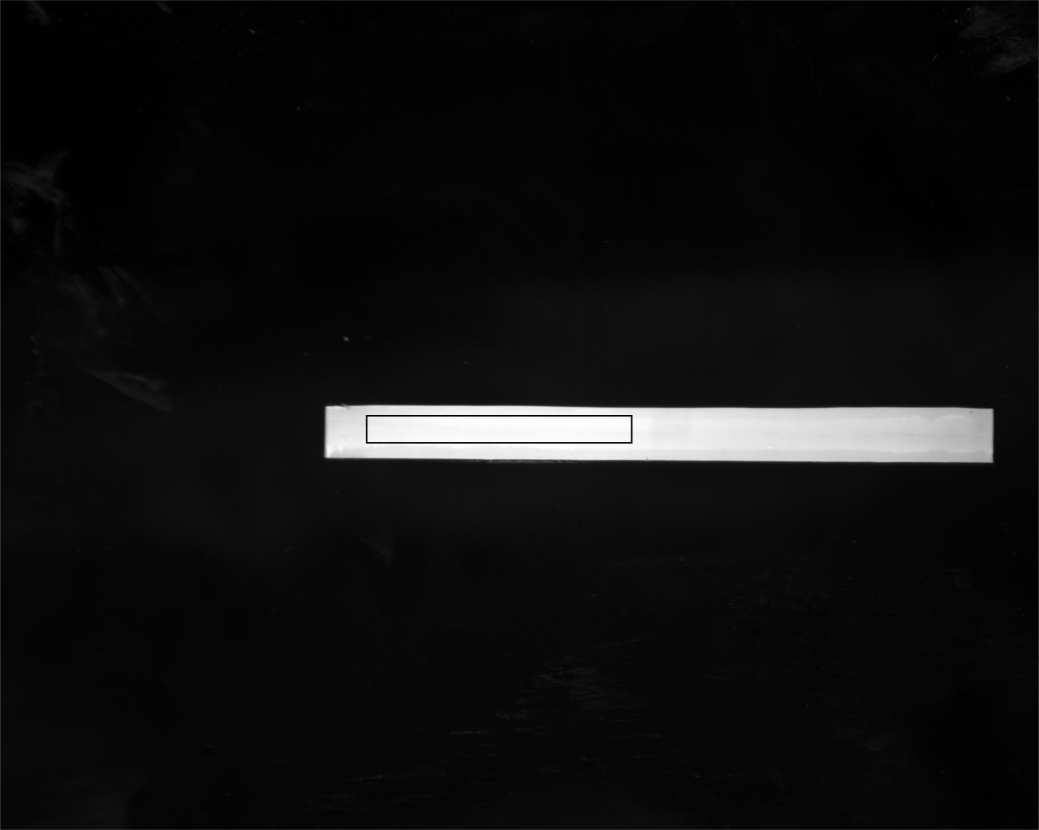  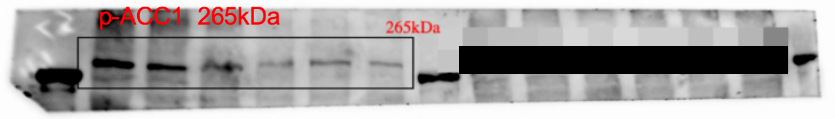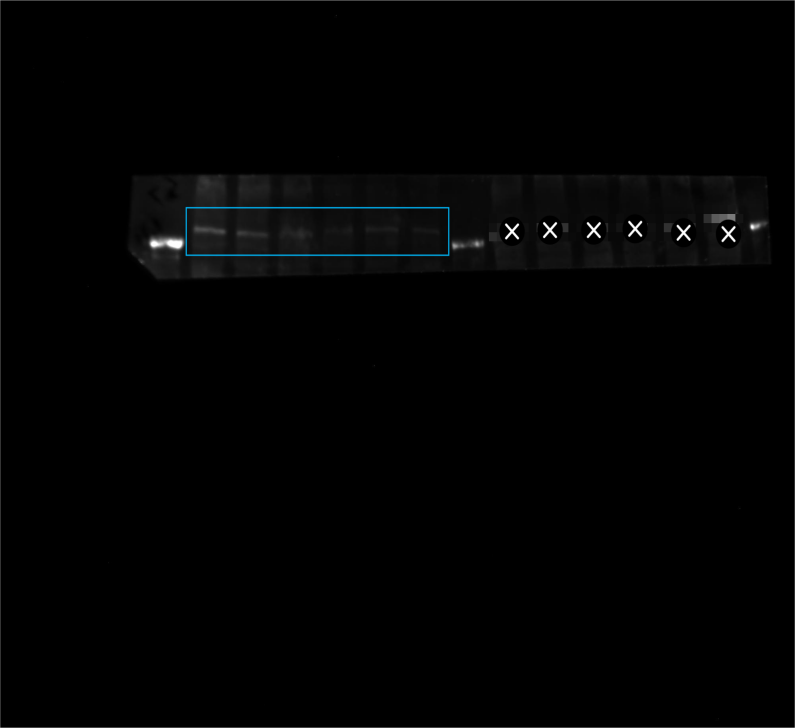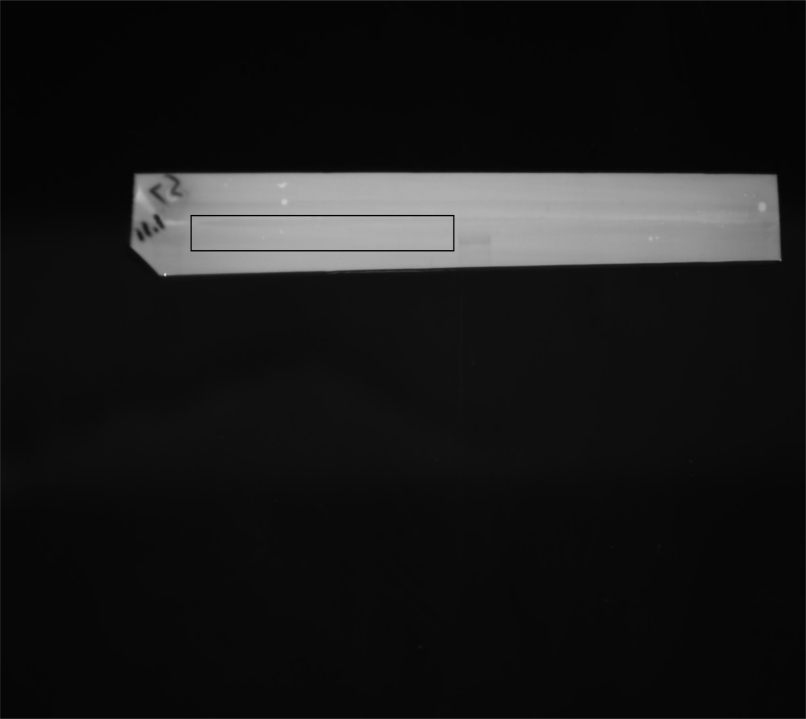  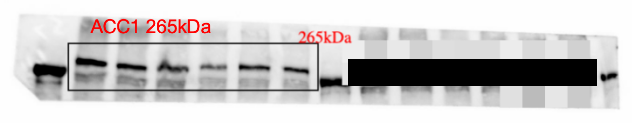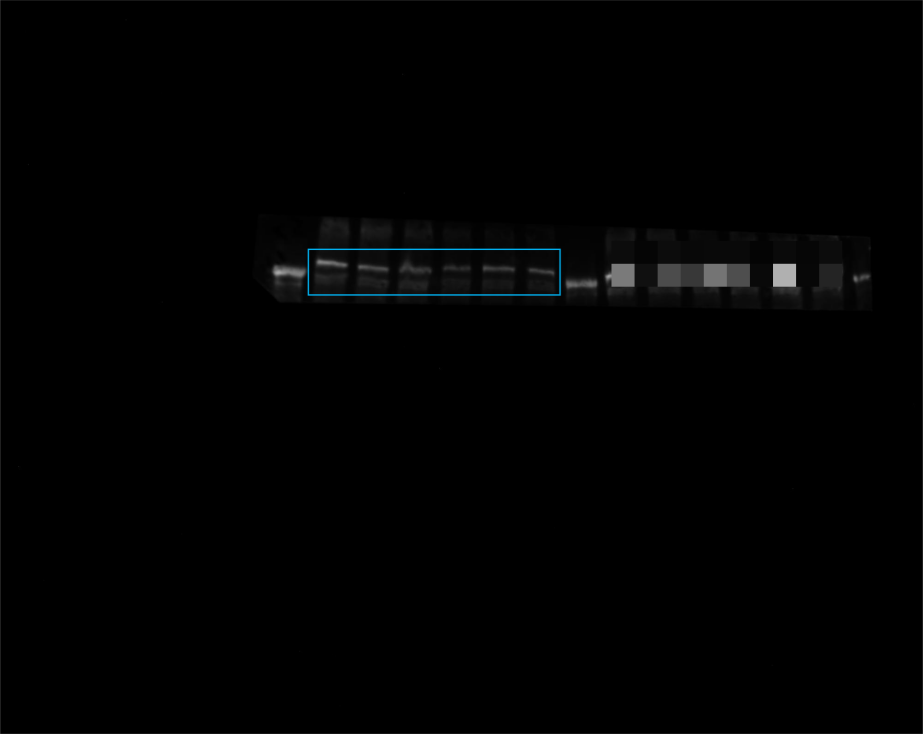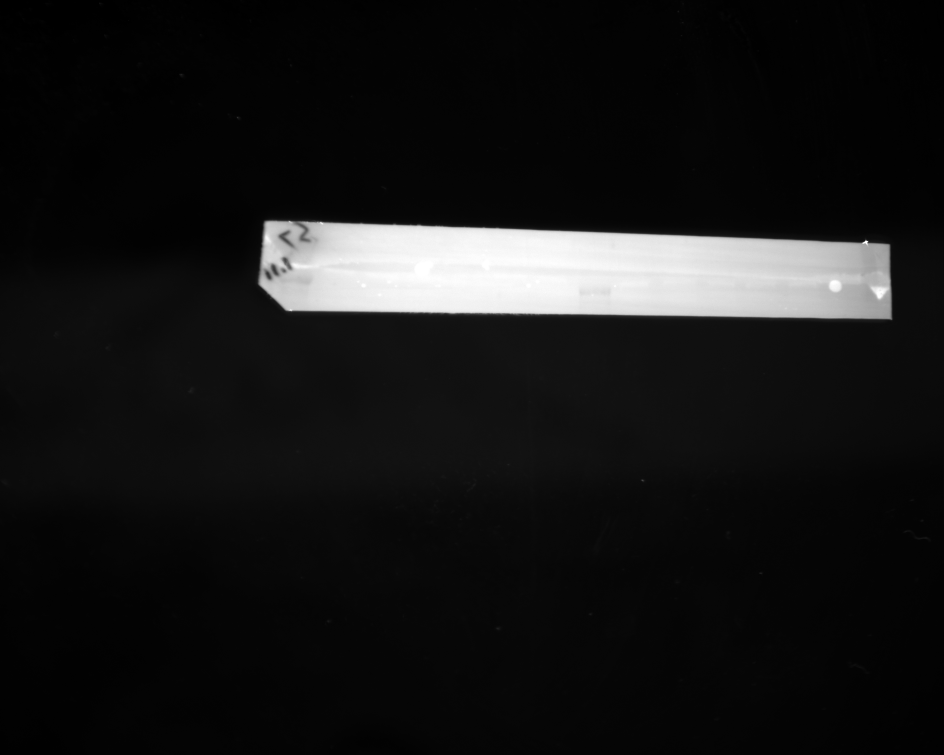  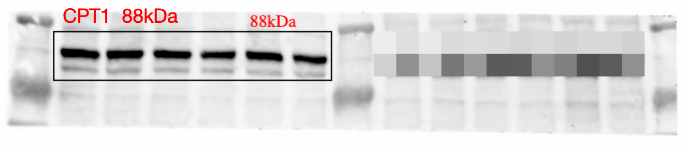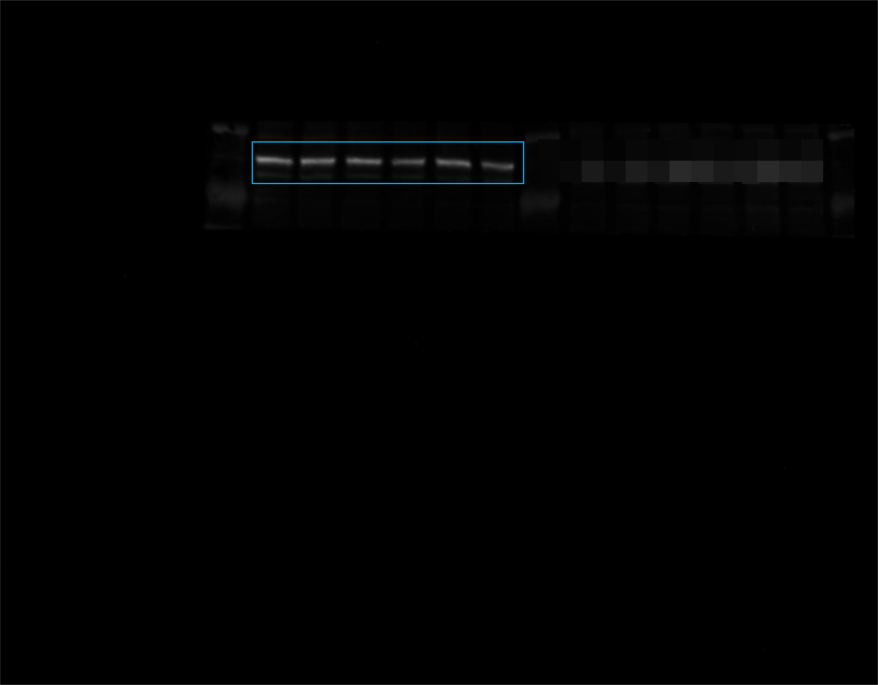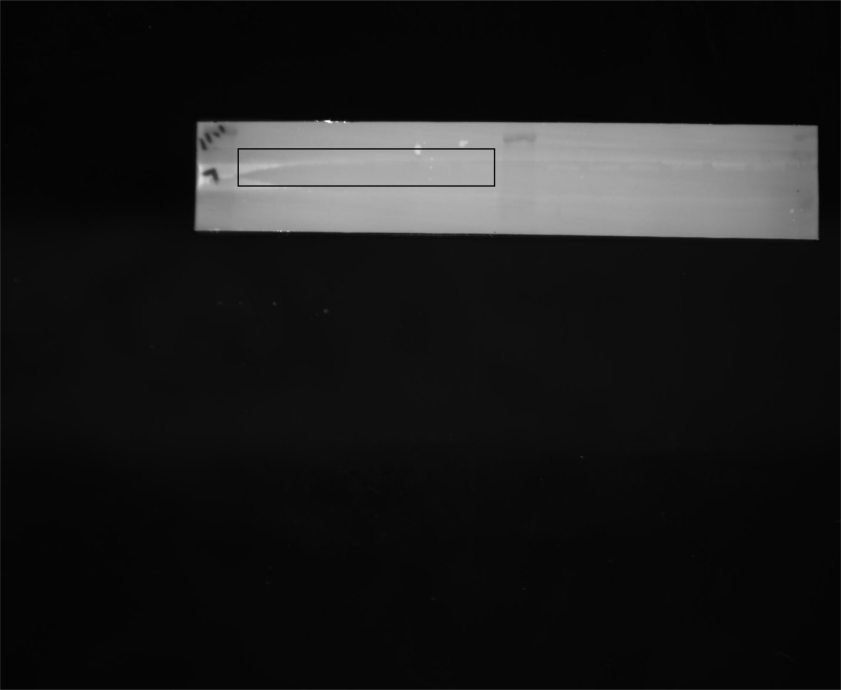  =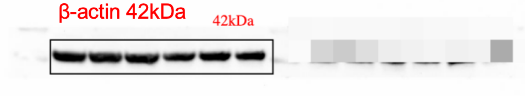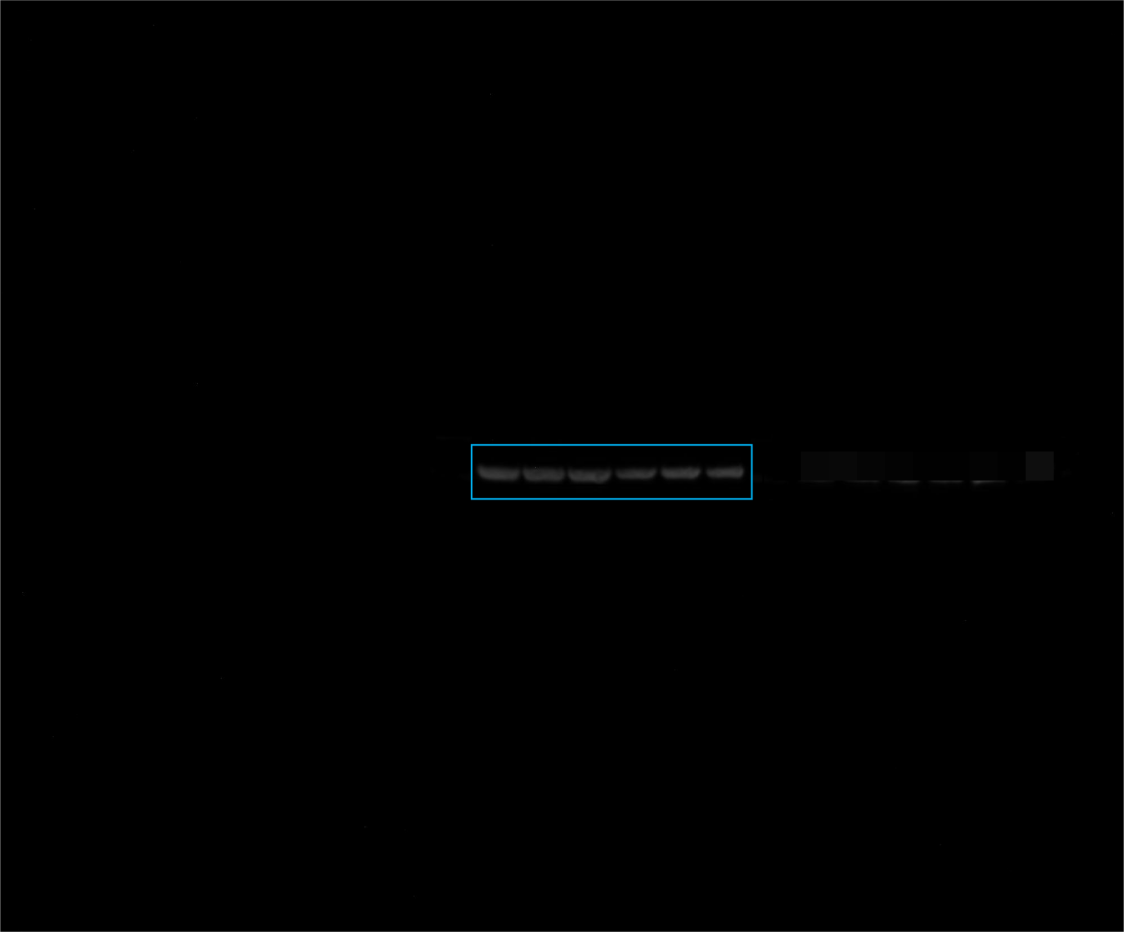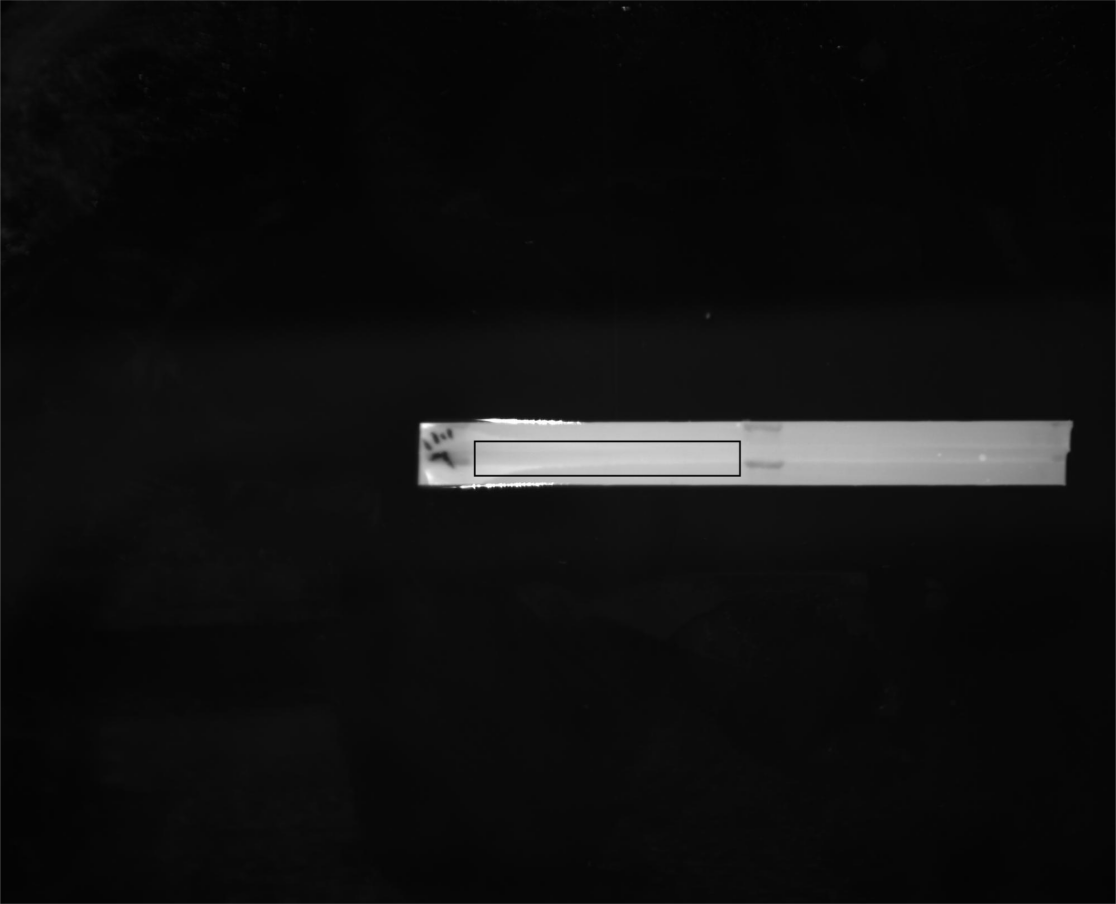 |

| Cropped blots in manuscript (Fig. 3 a, c) |
| --- |
| 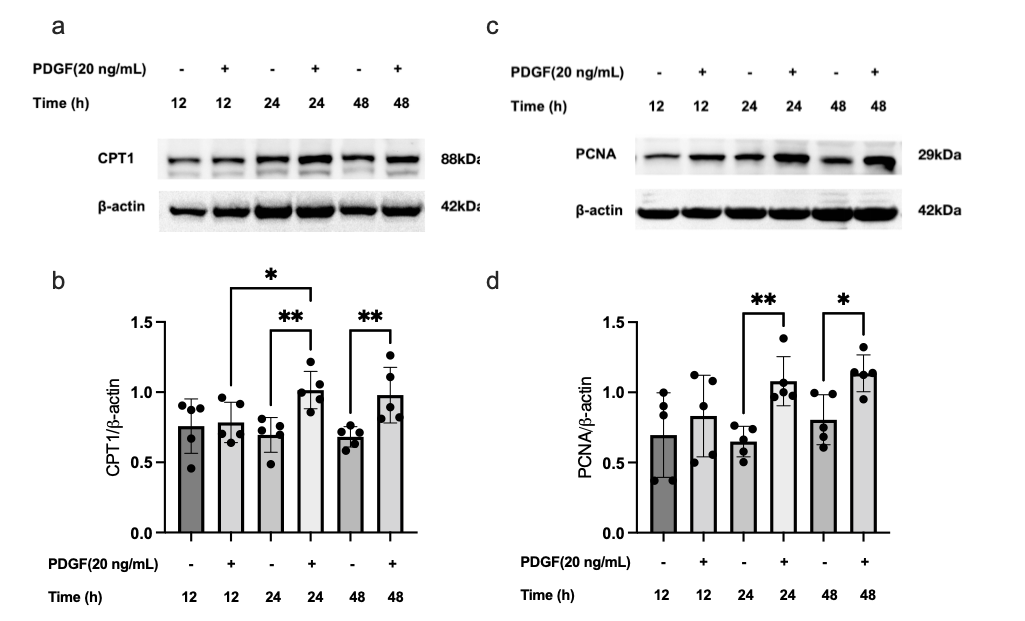 |
| Original blots in supplementary information (Fig. 3 a, c)  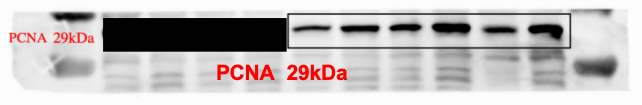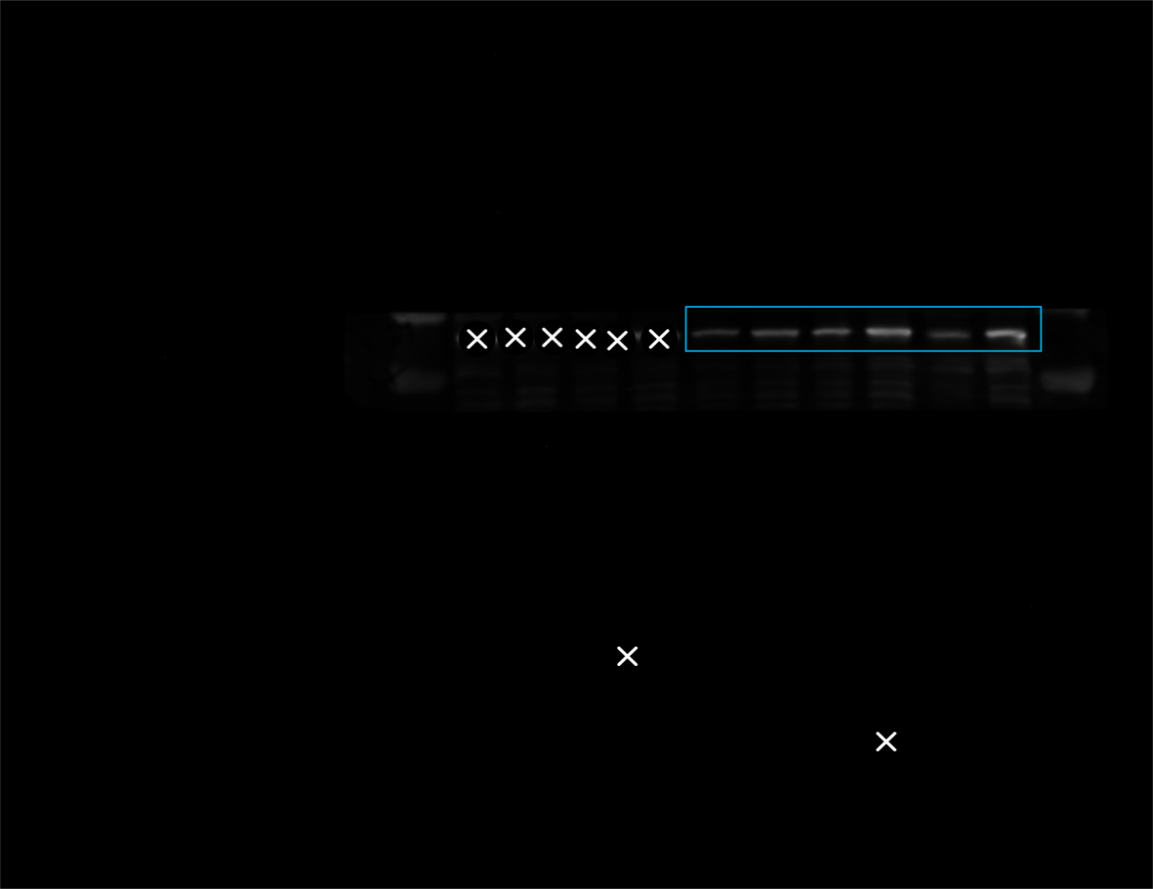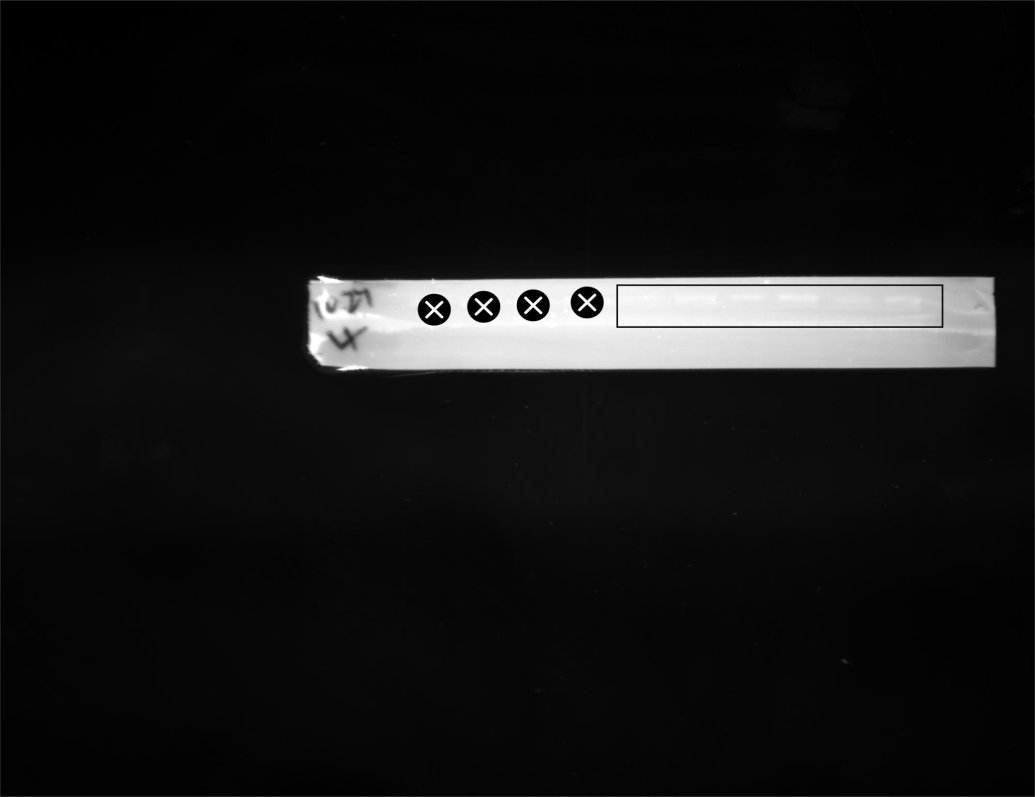  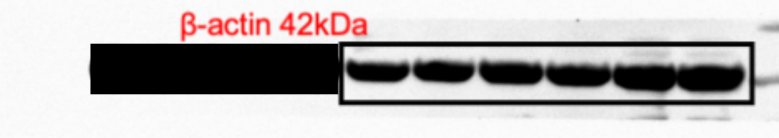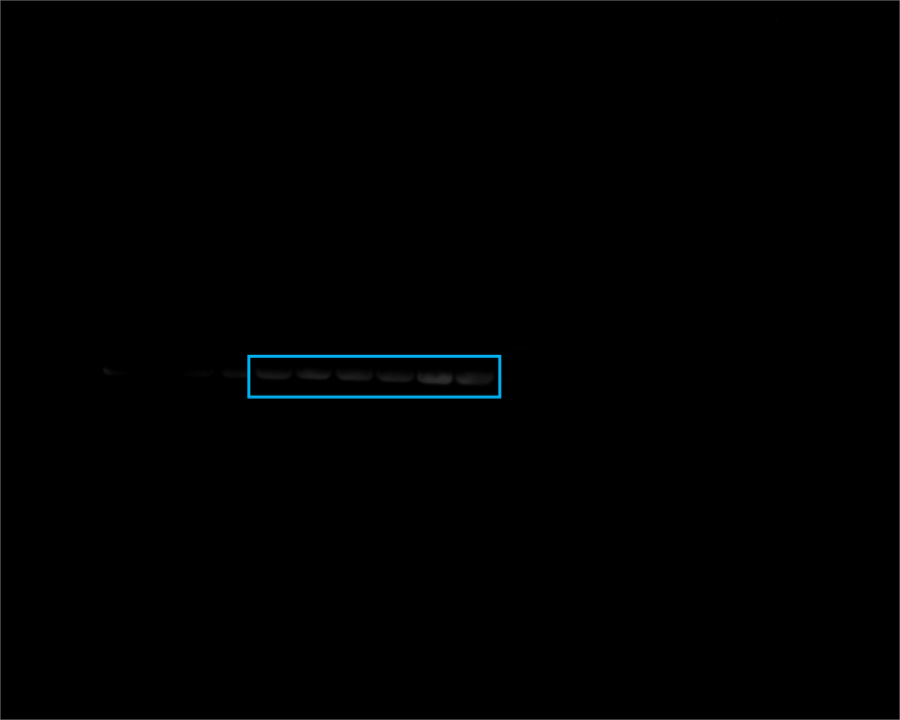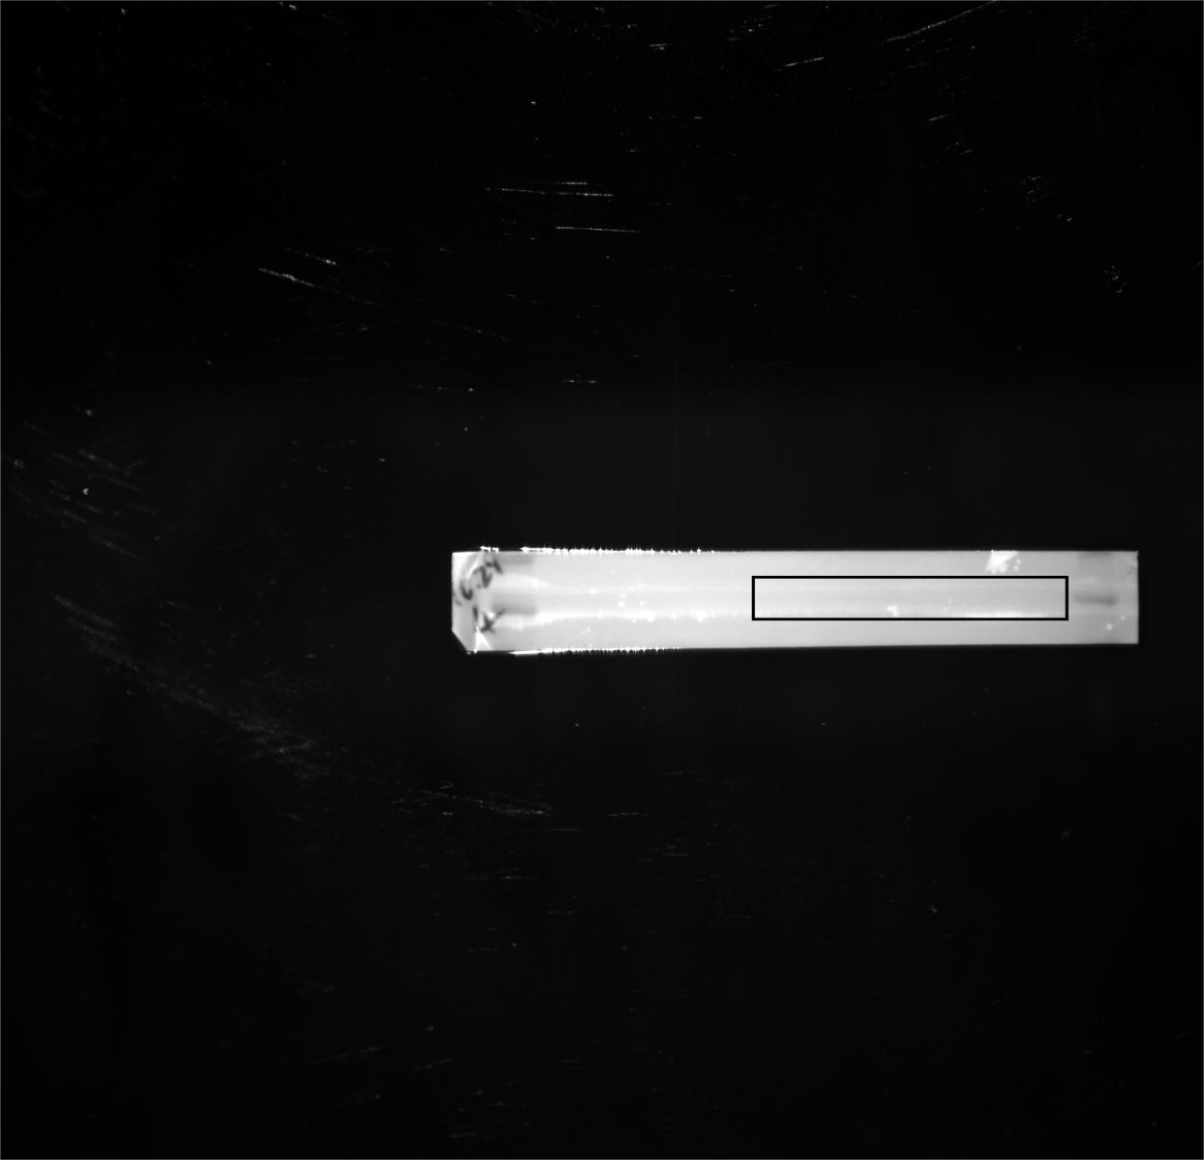  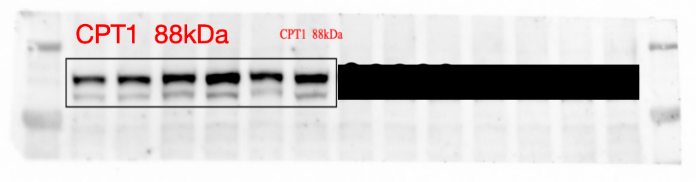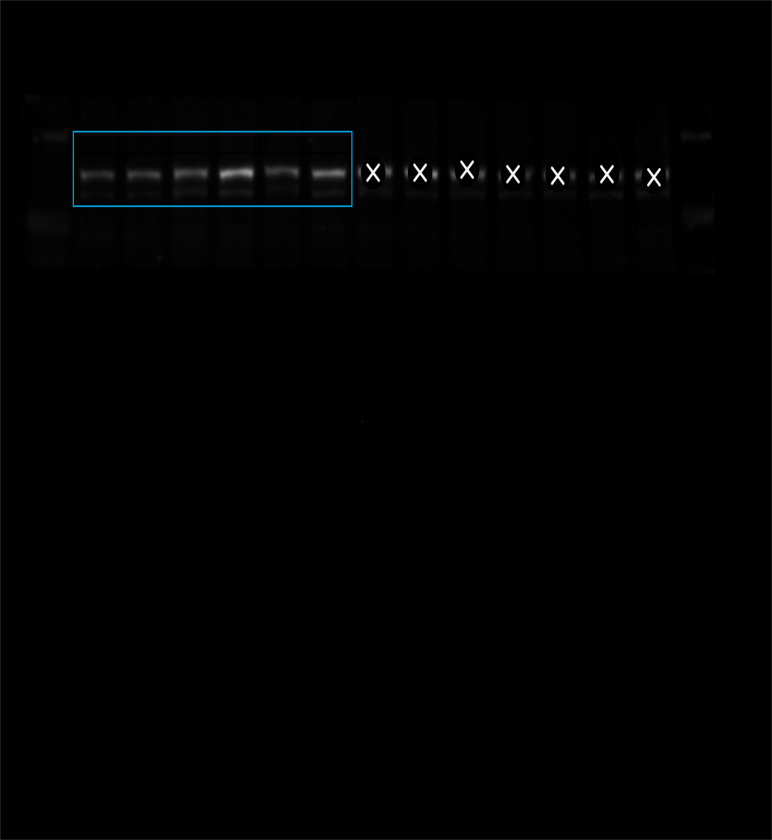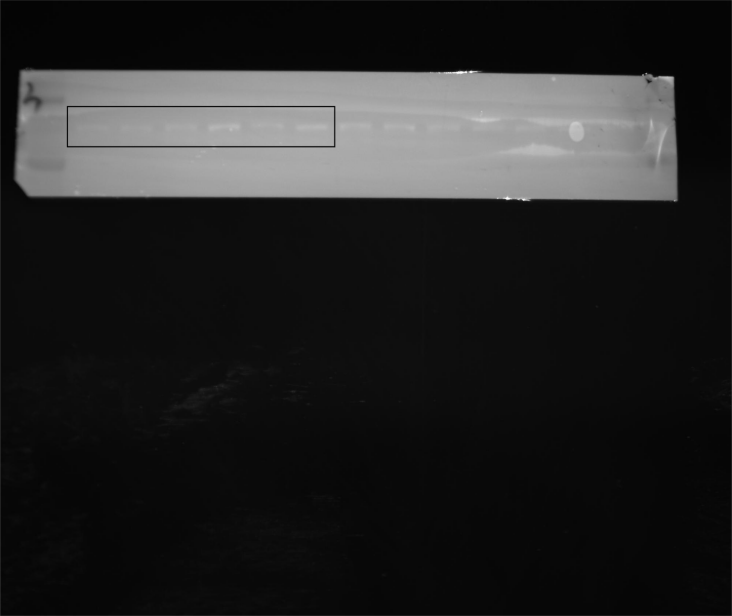  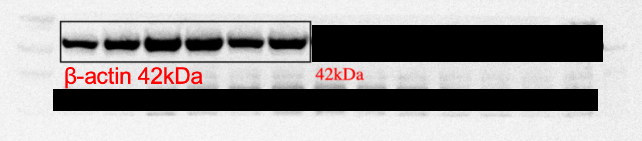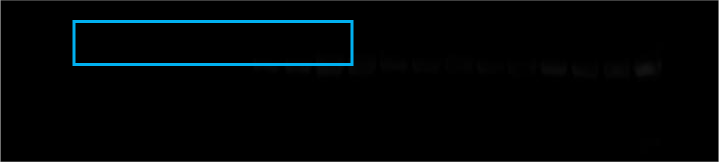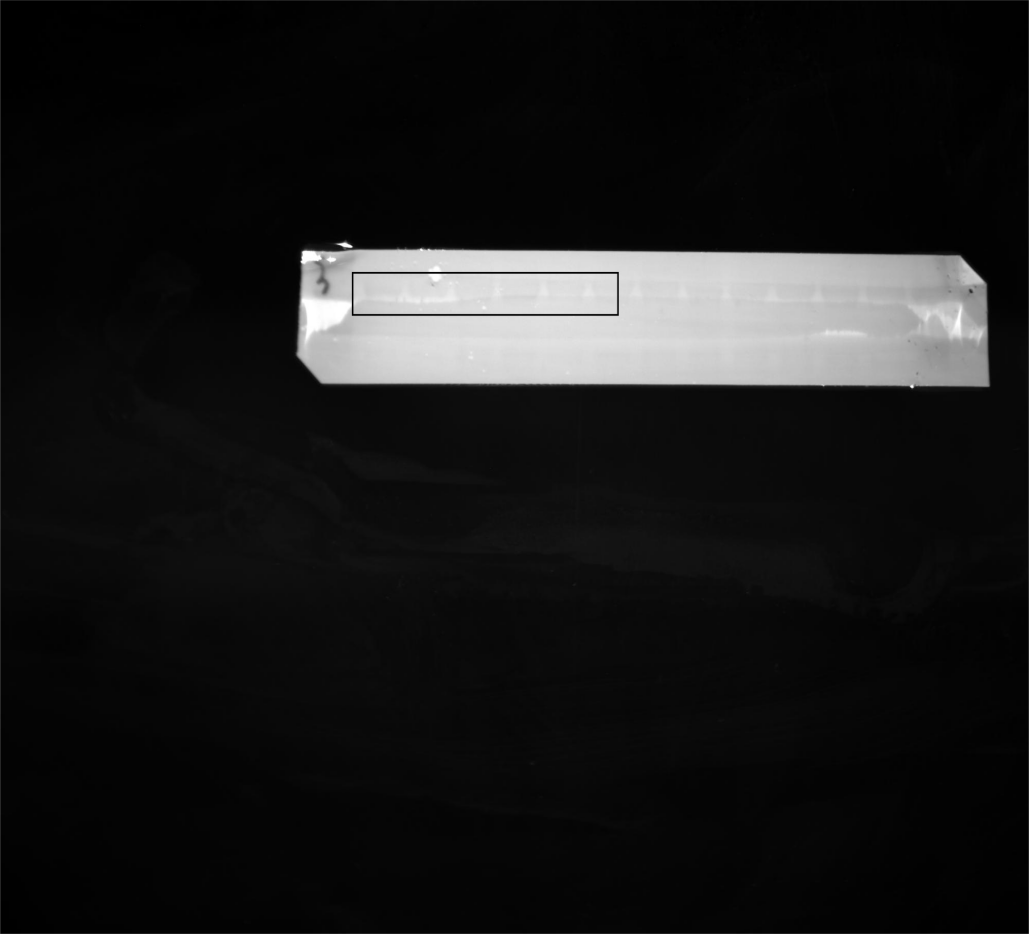 |

| Cropped blots in manuscript (Fig. 4 a) |
| --- |
| 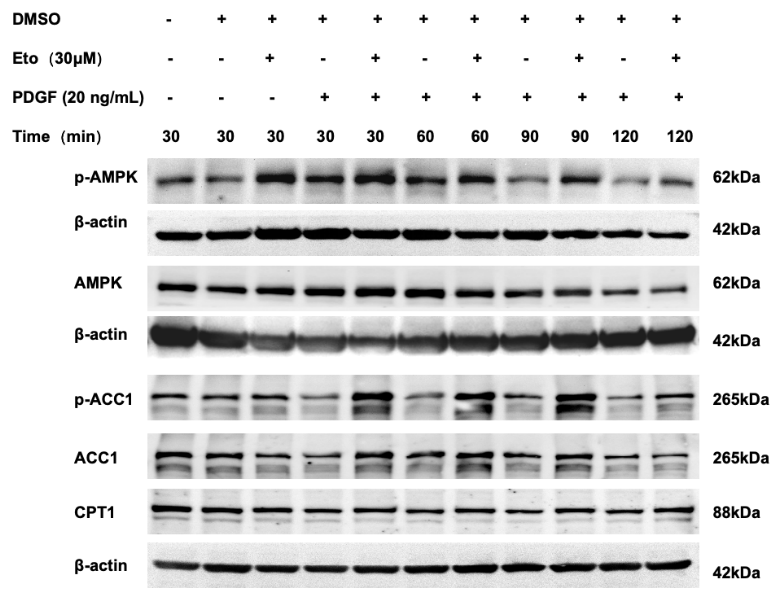 |

| Original blots in supplementary information (Fig. 4 a) |
| --- |
| 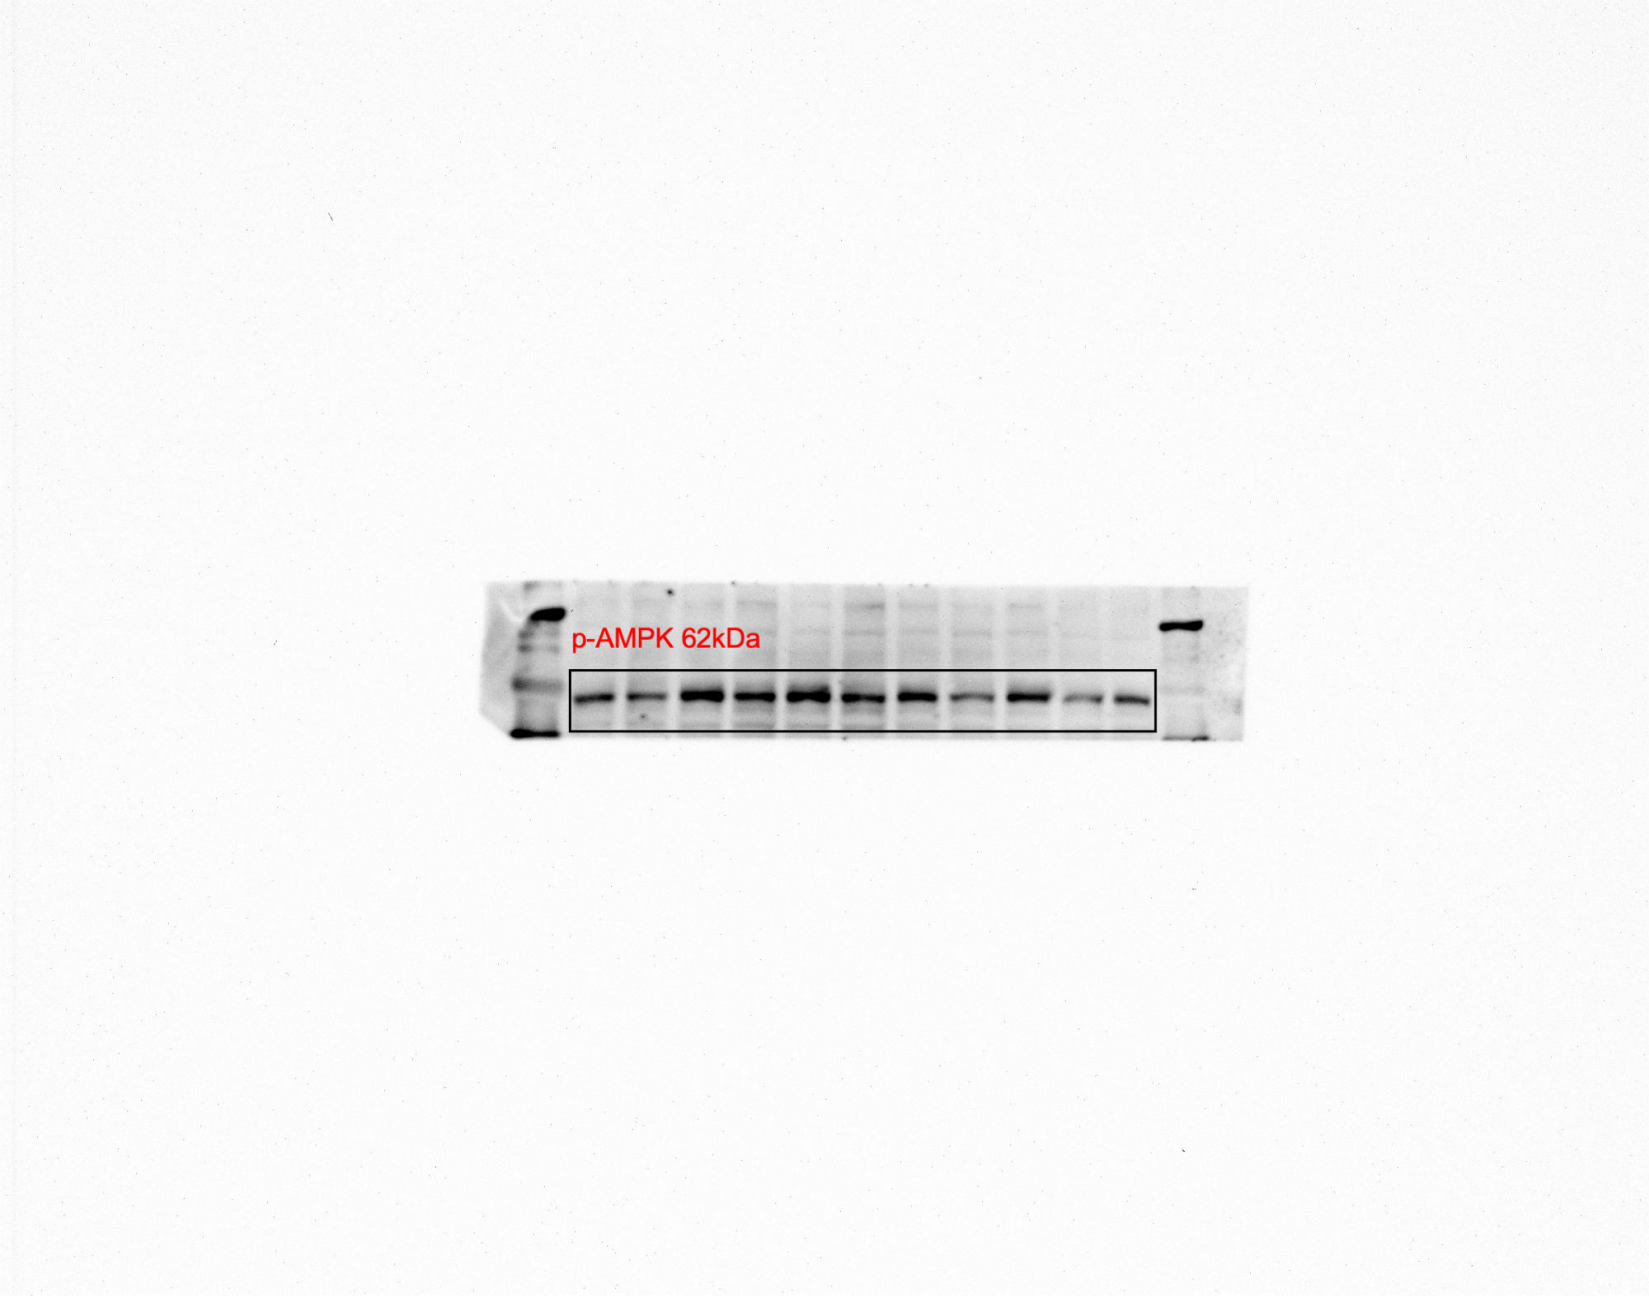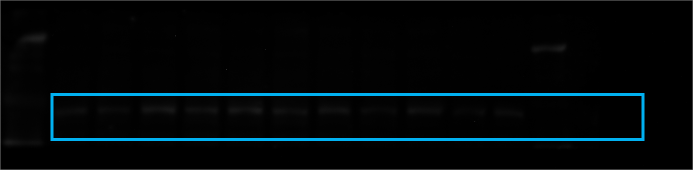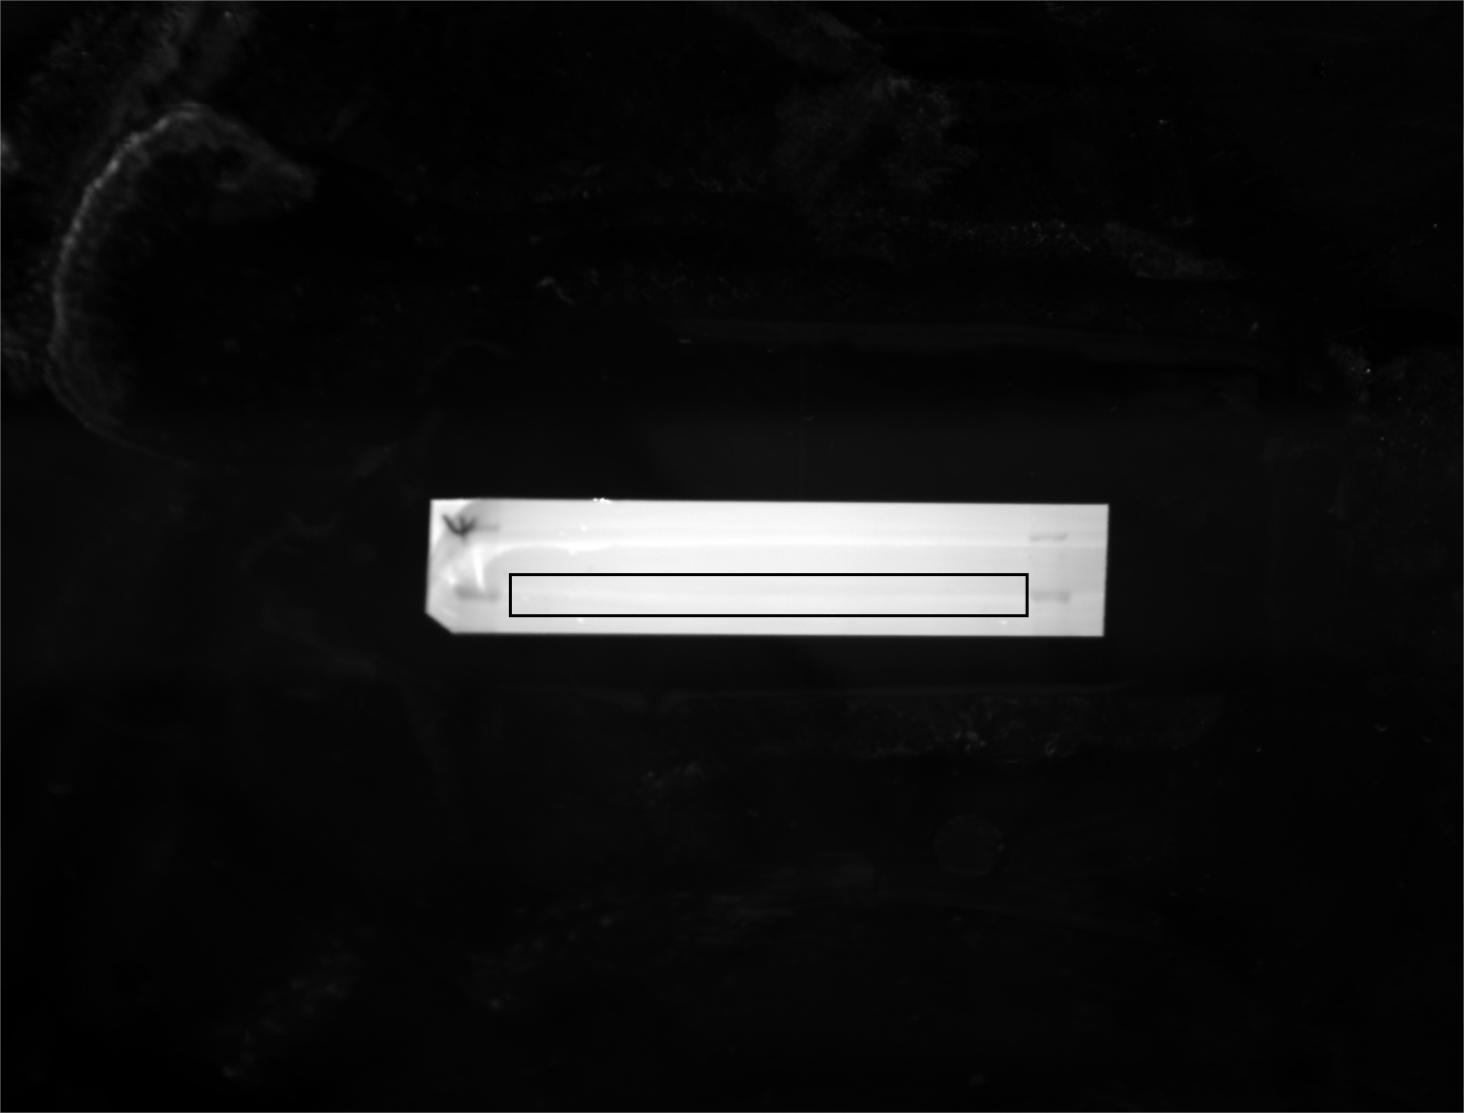 |
| 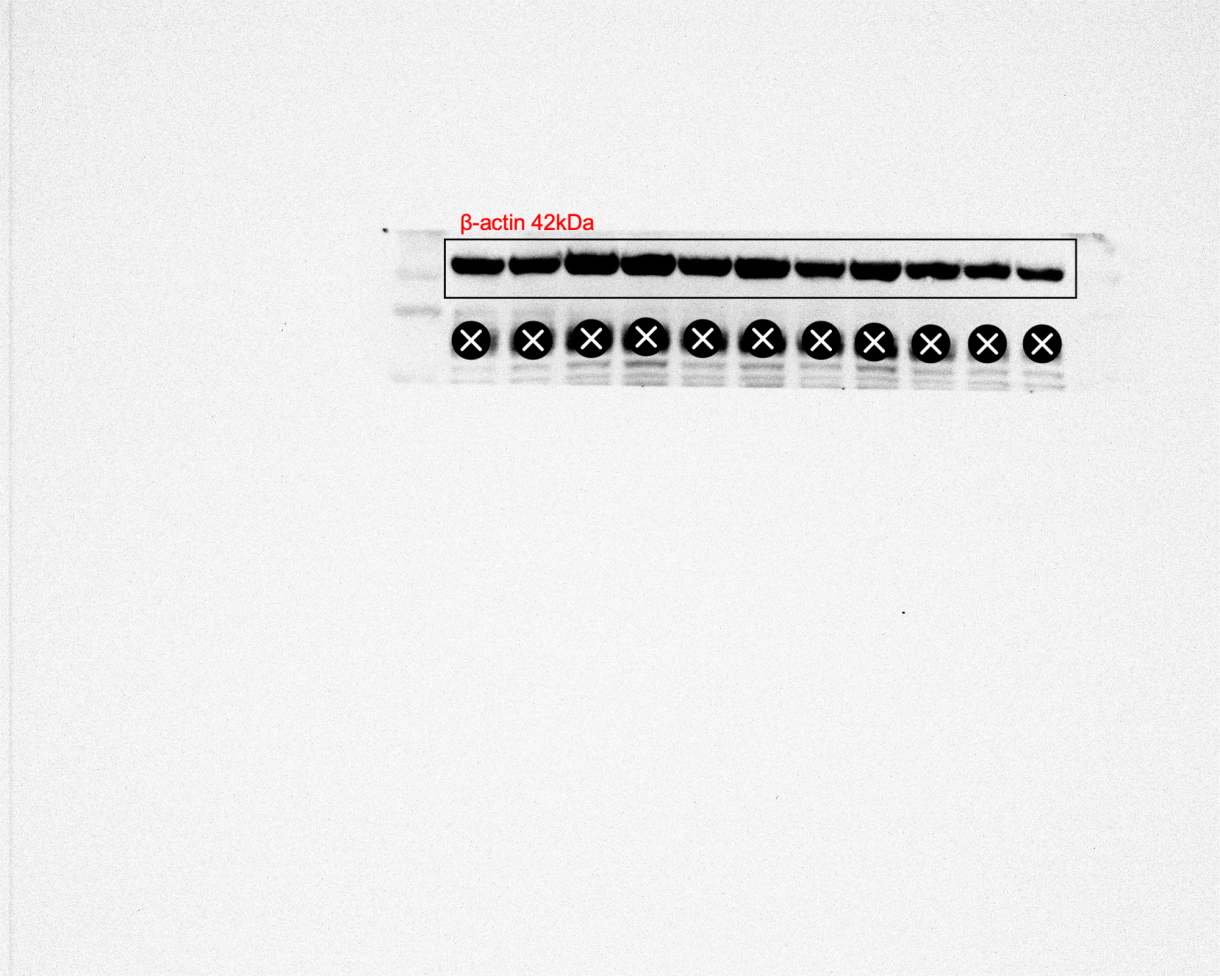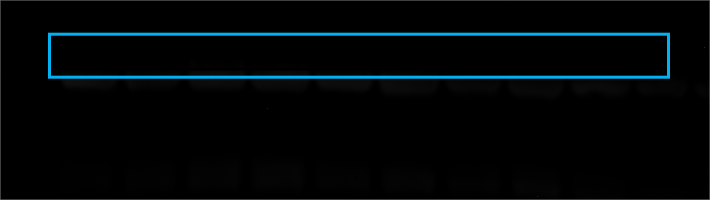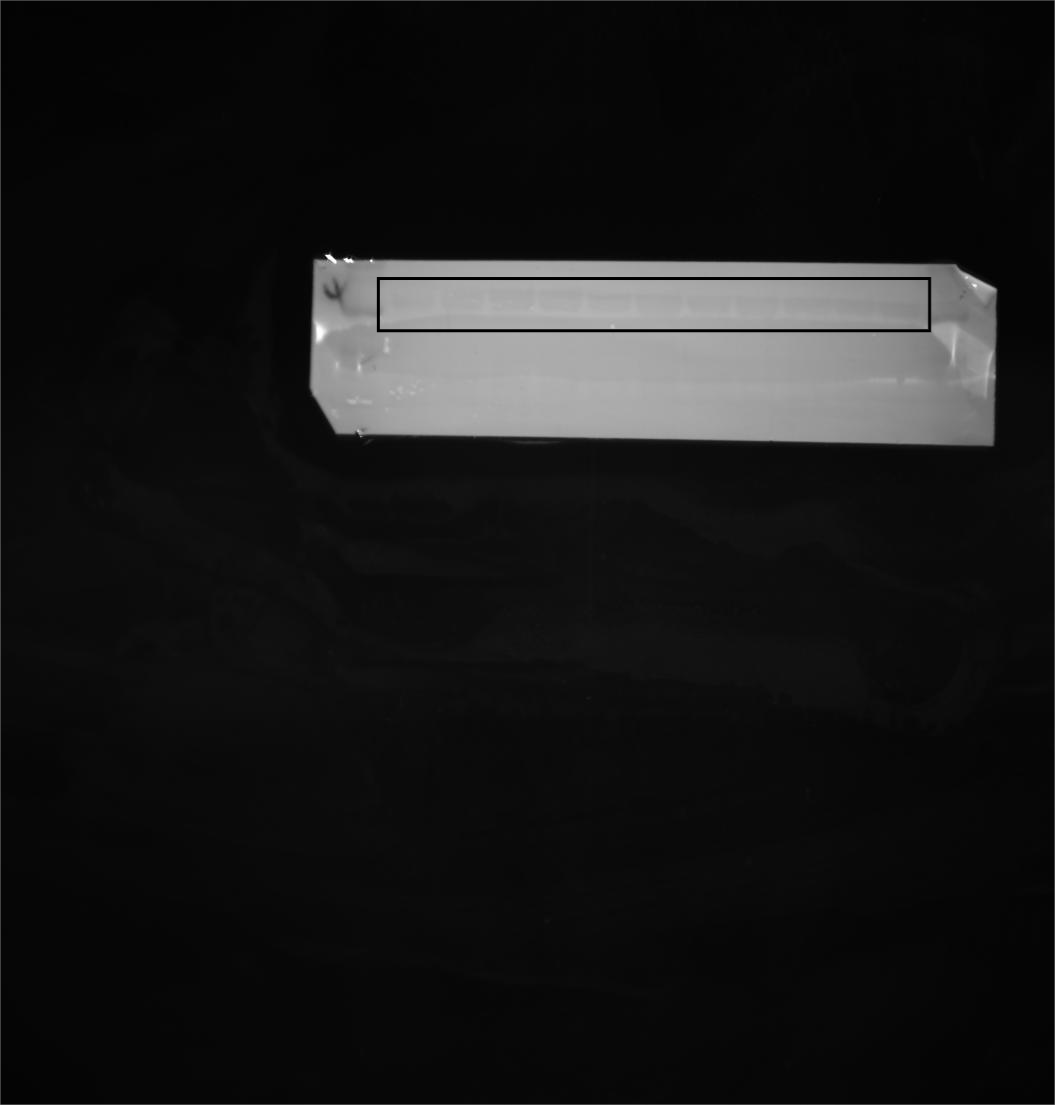 |
| 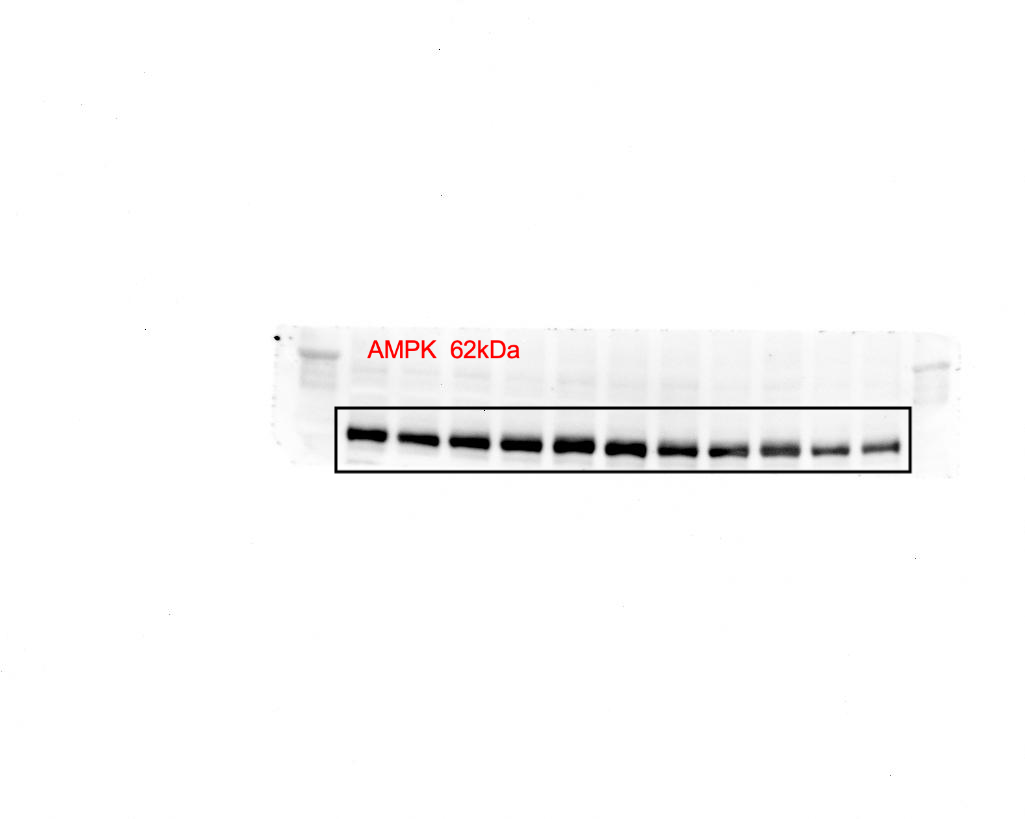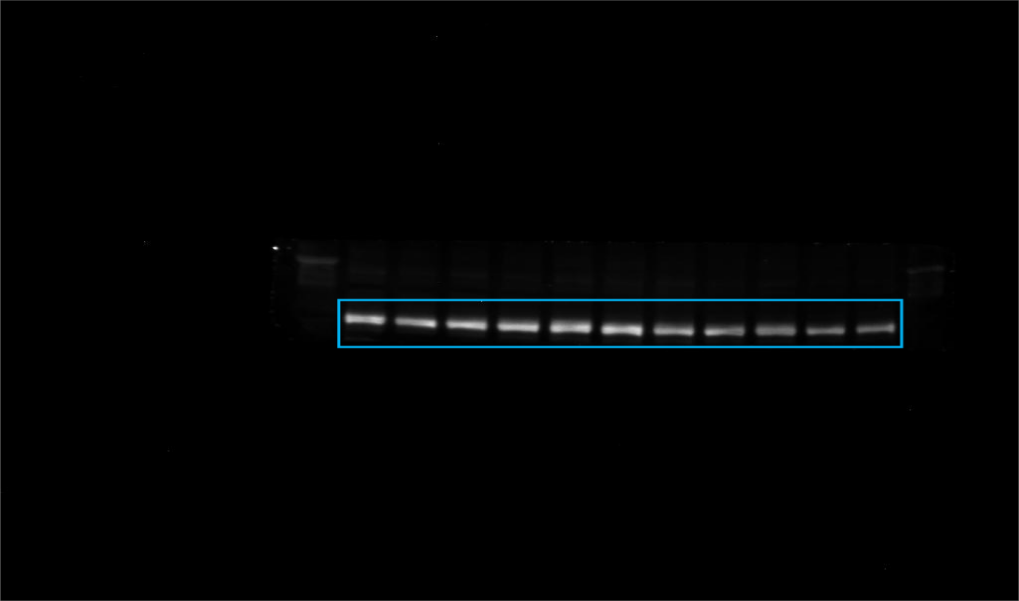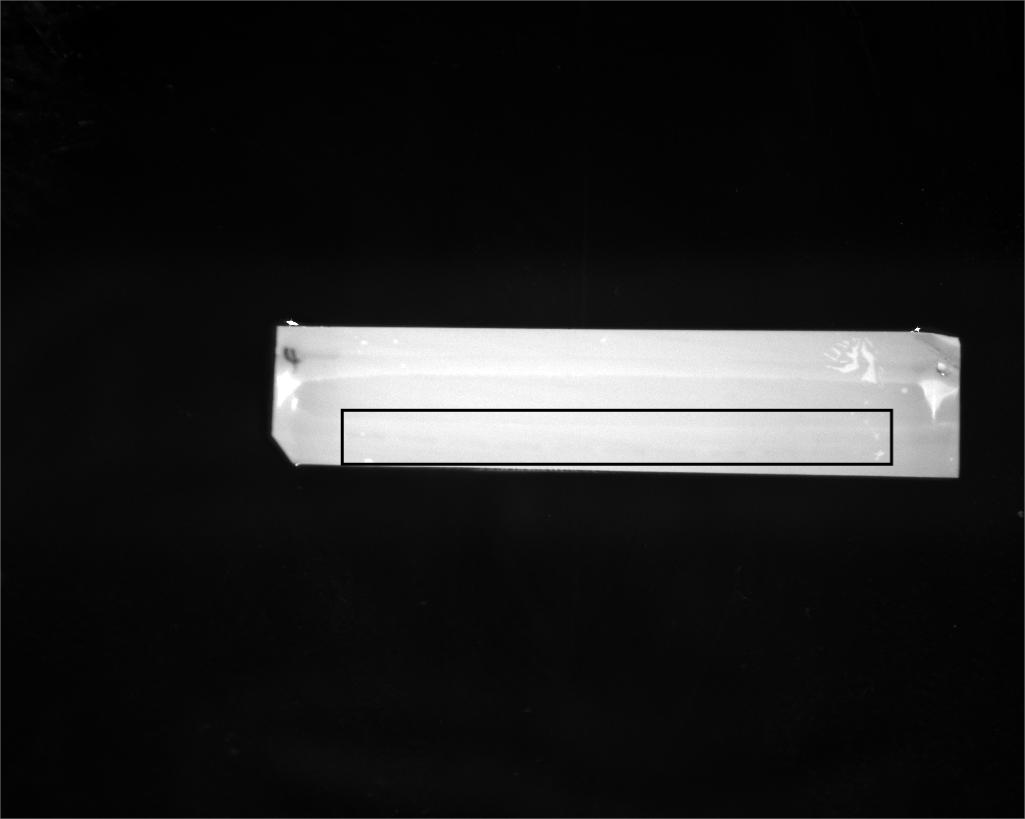  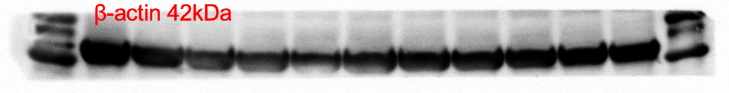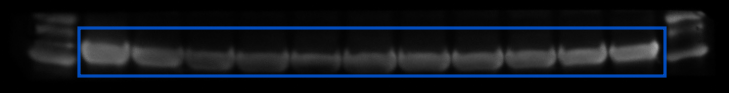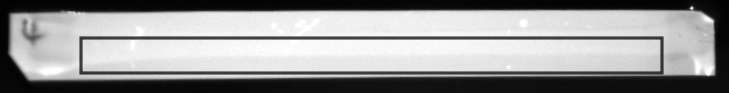 |
| 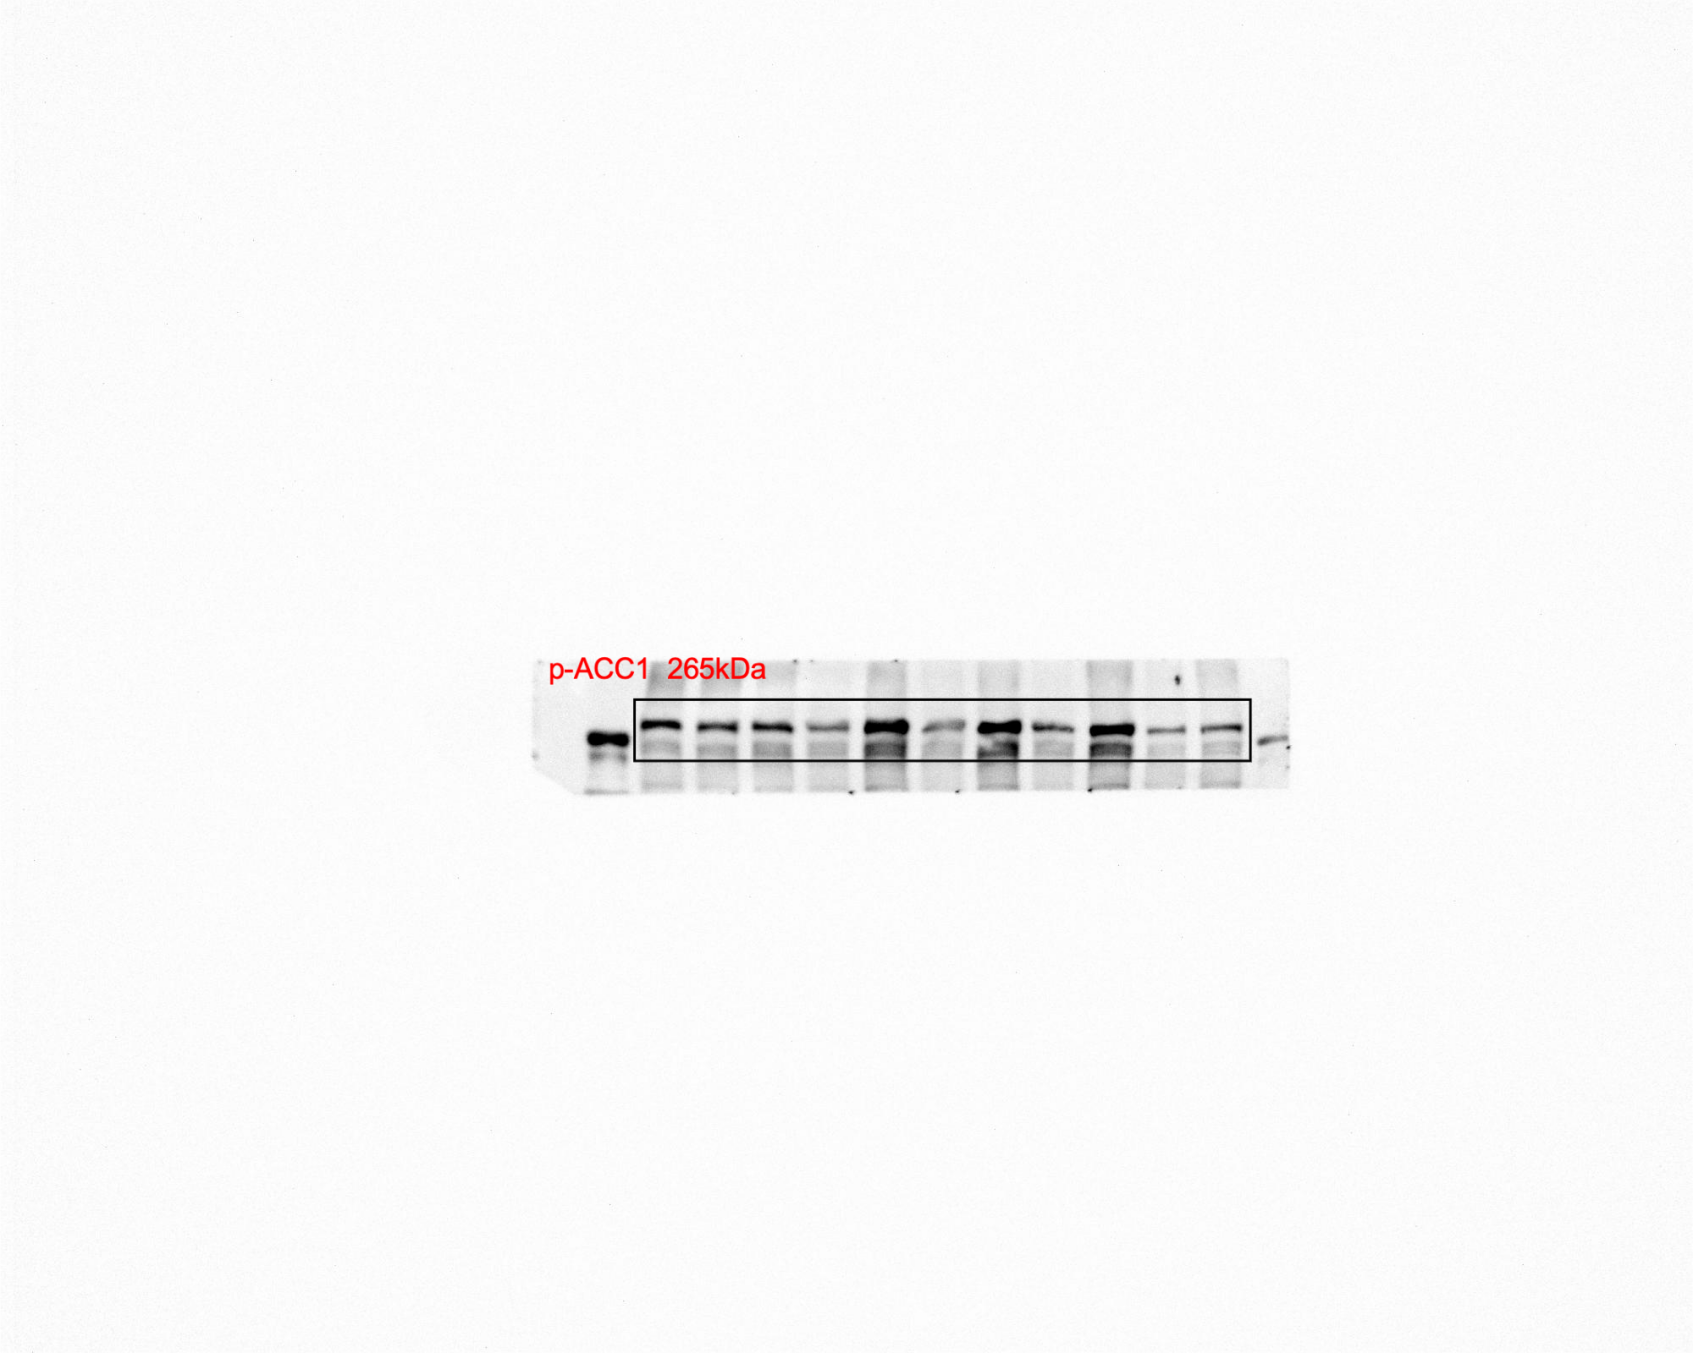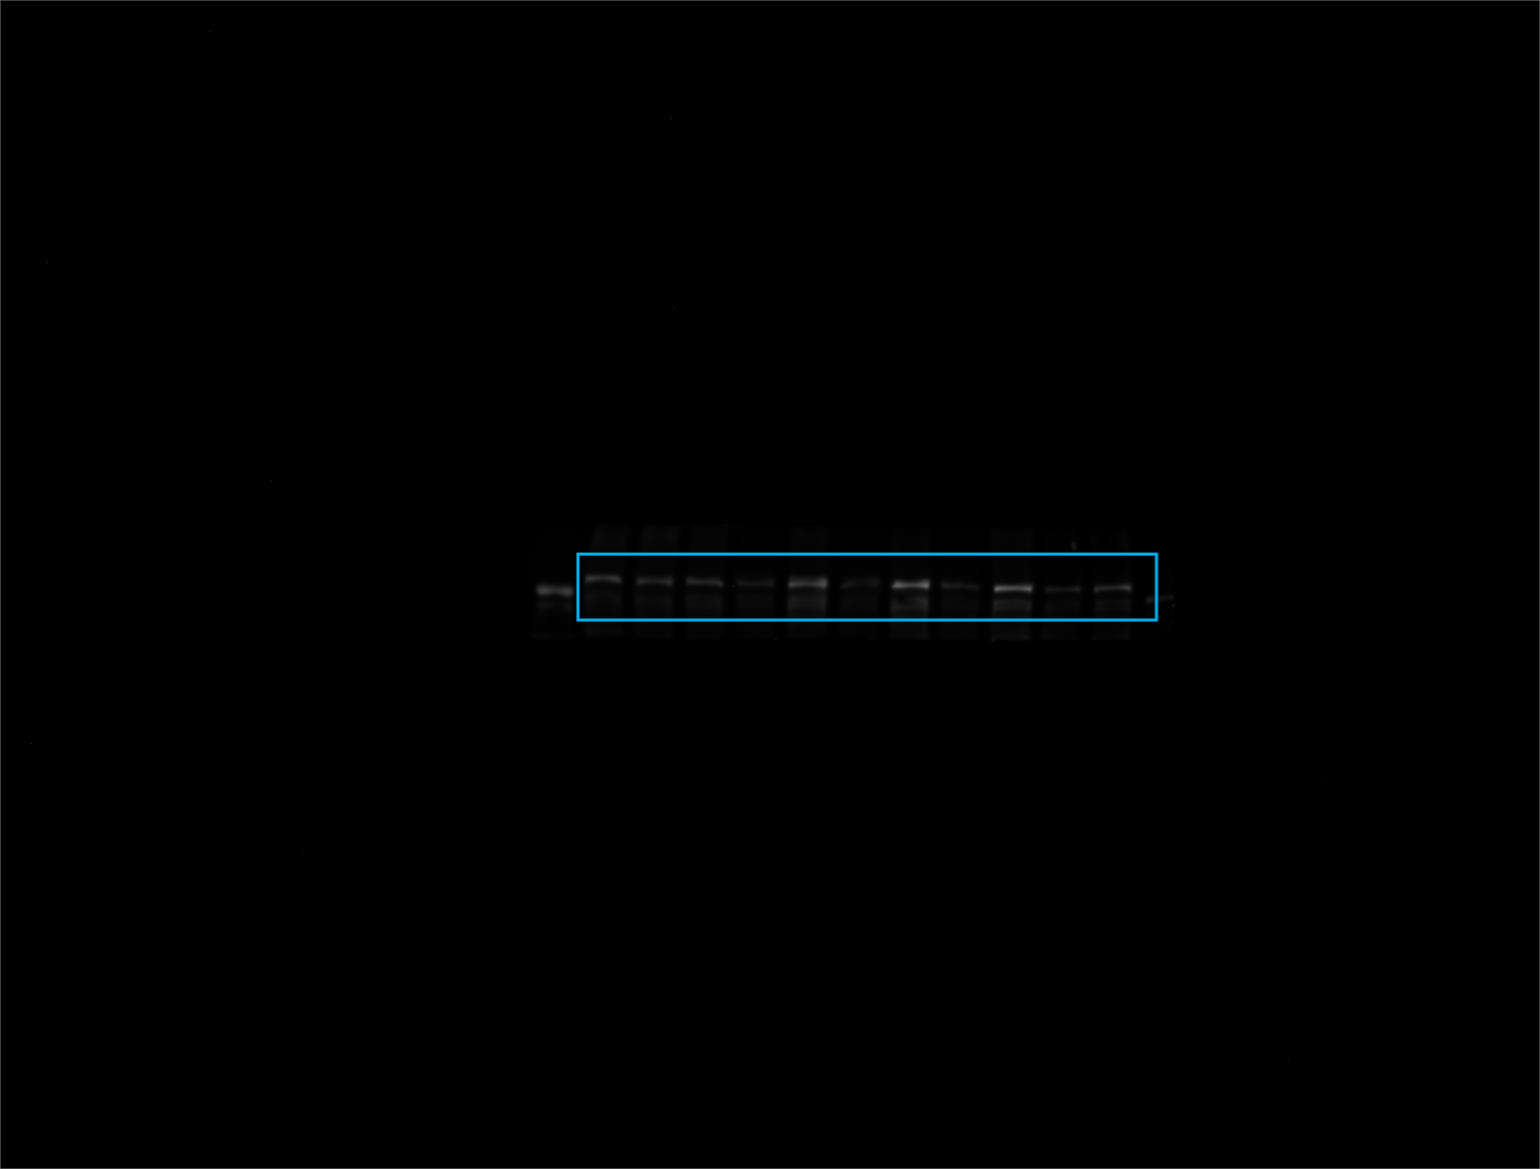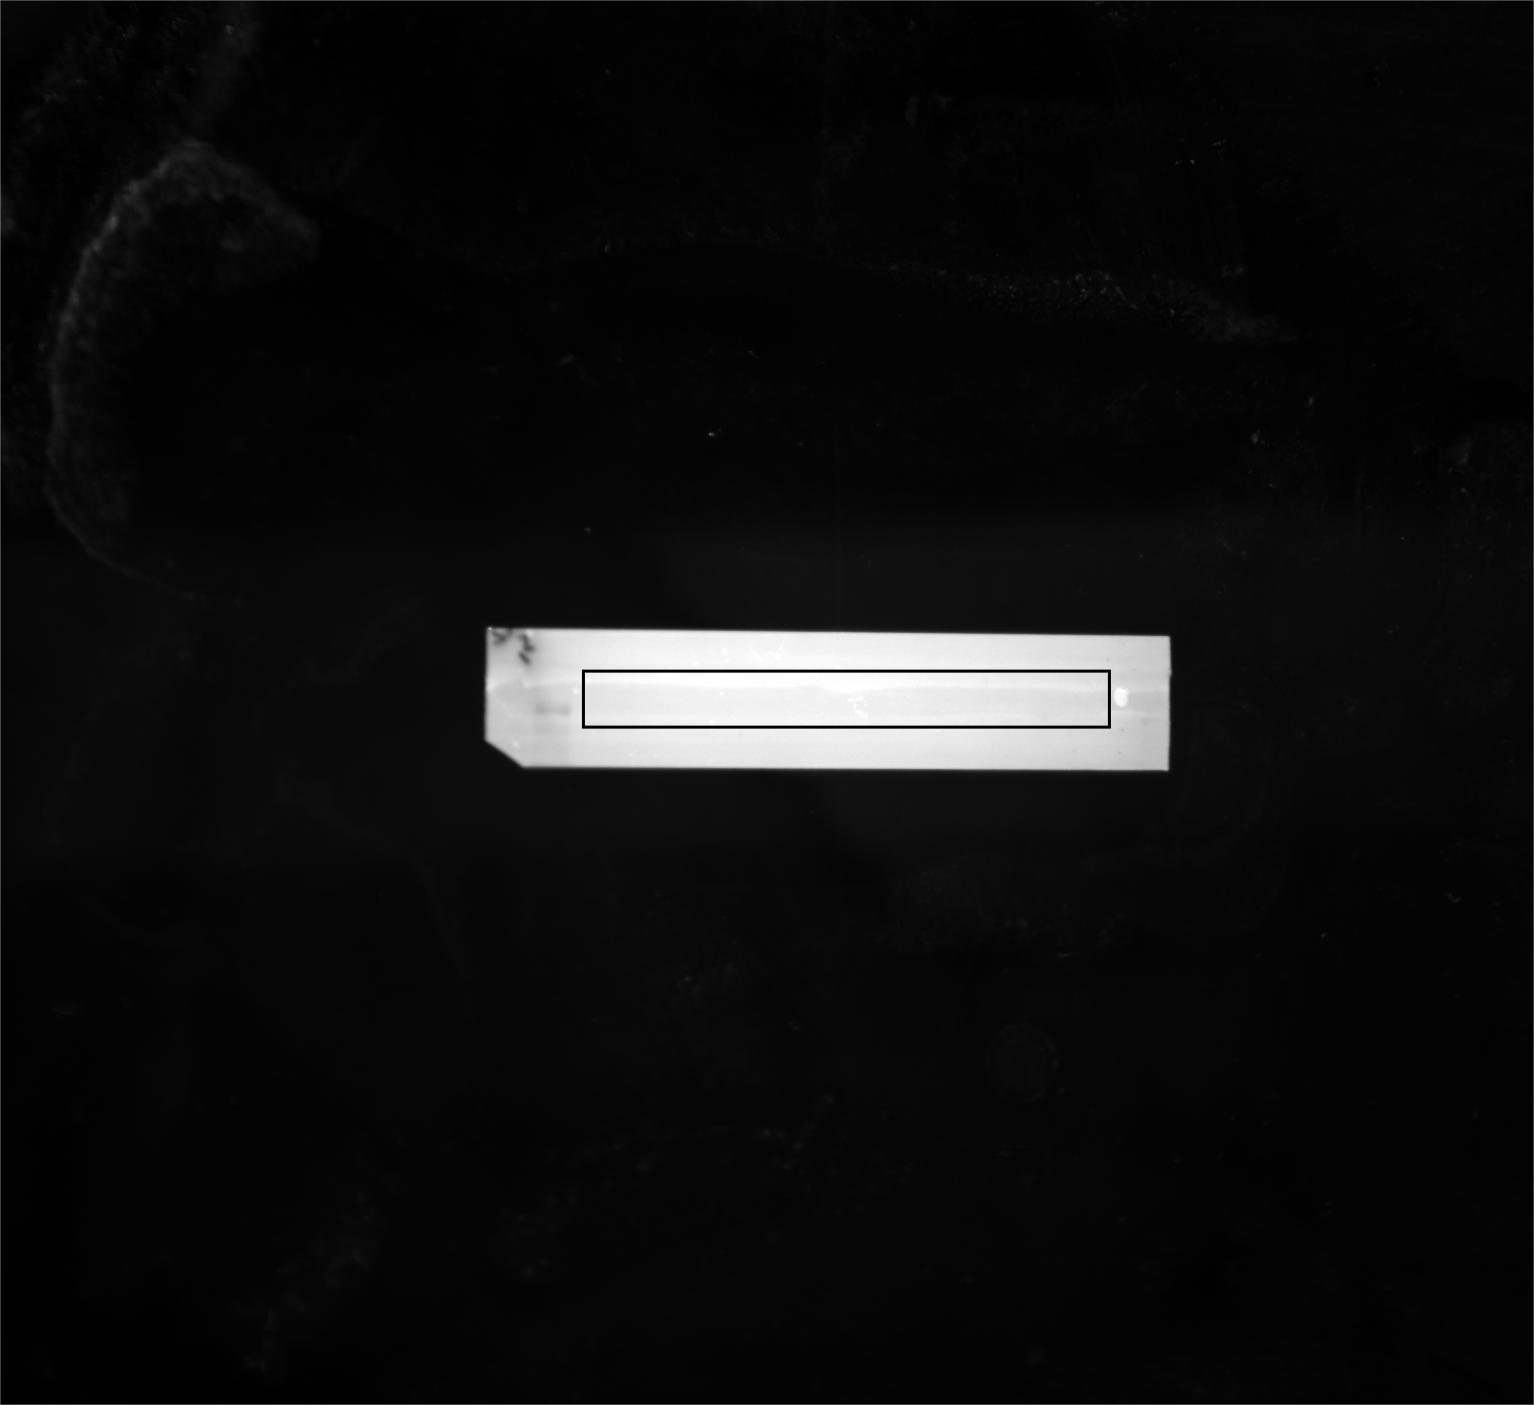 |
| 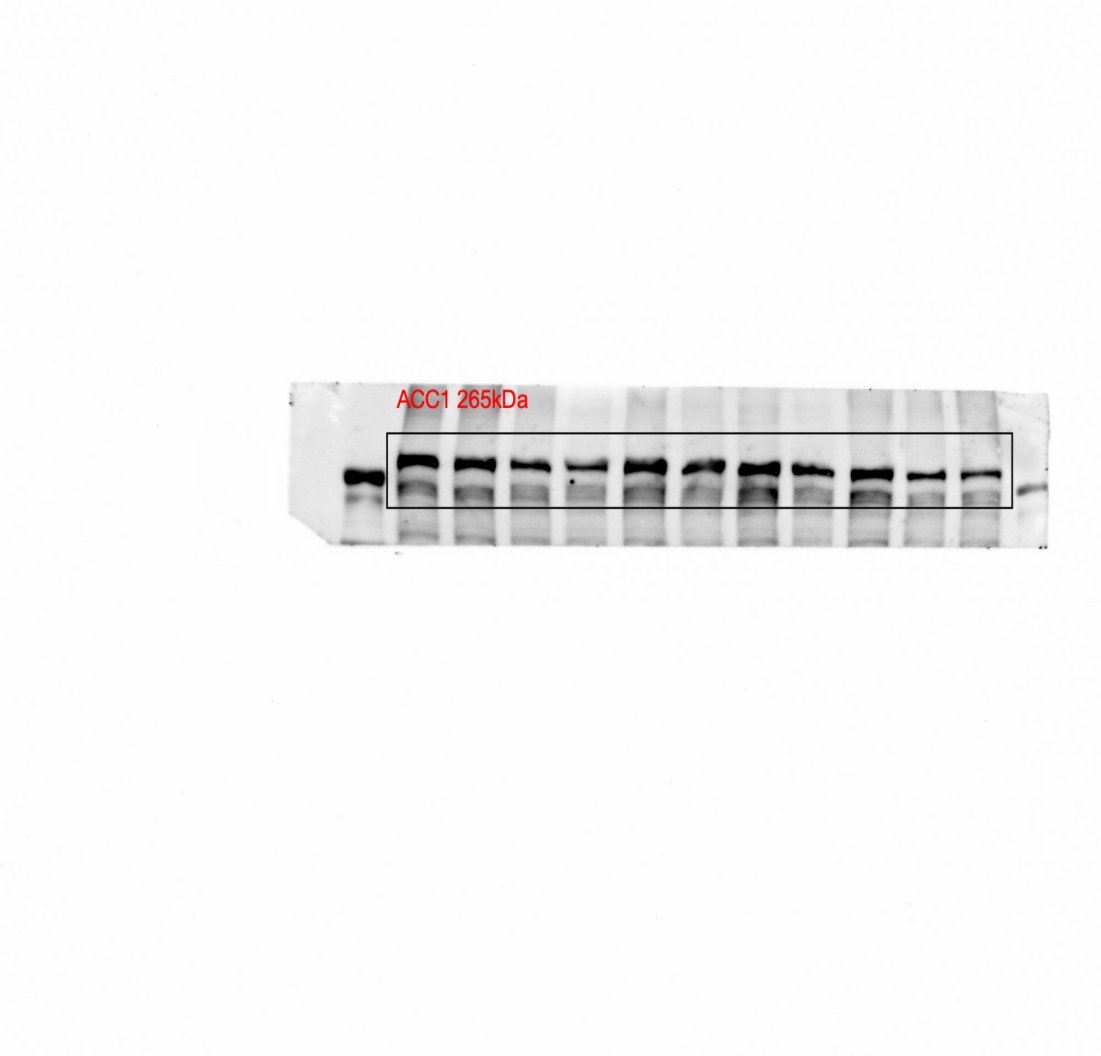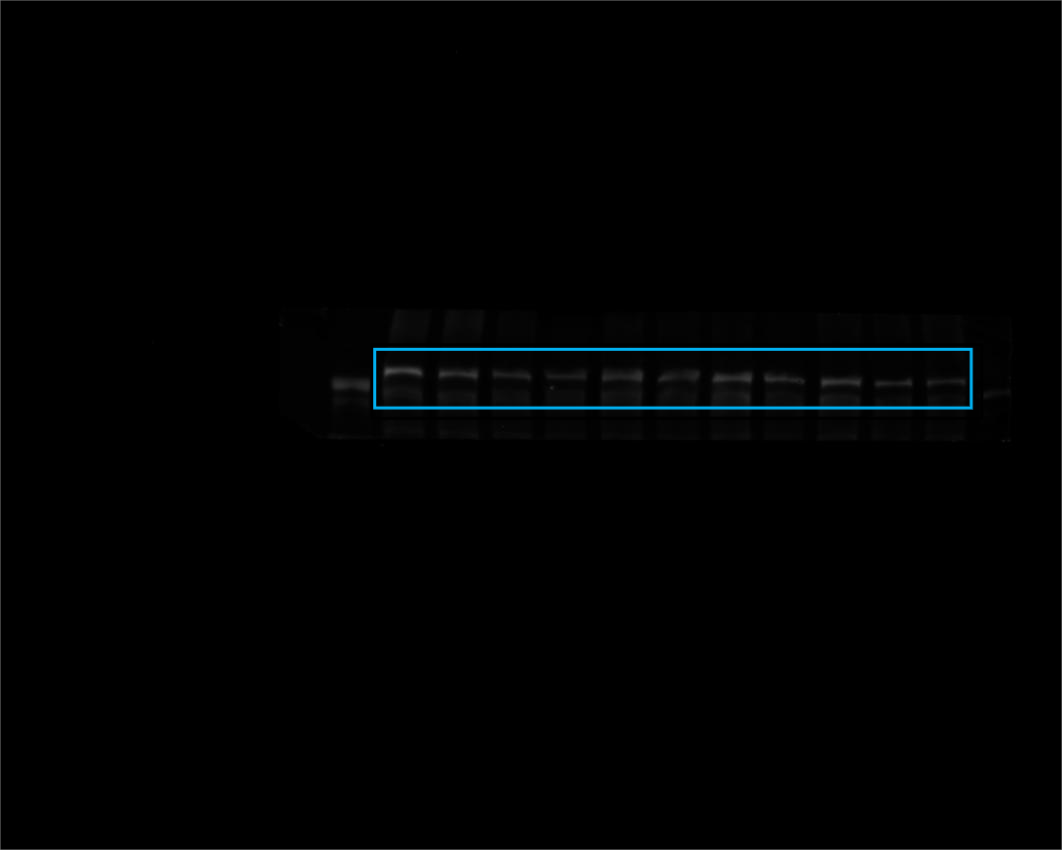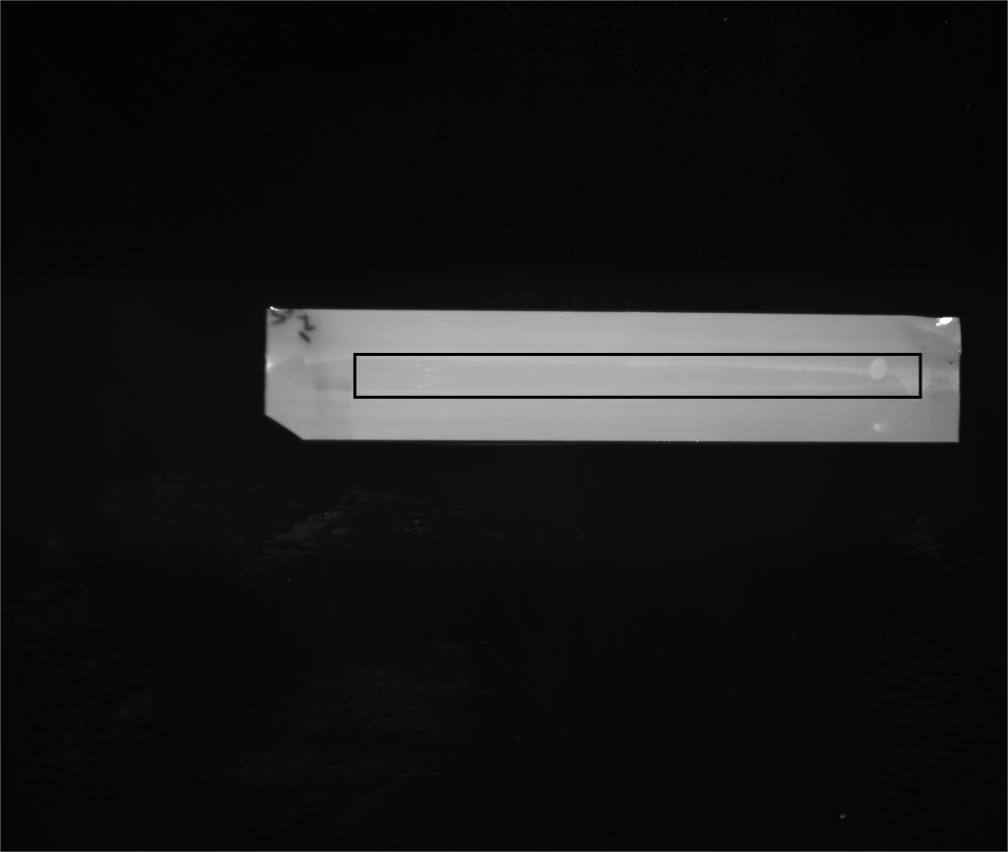 |
| 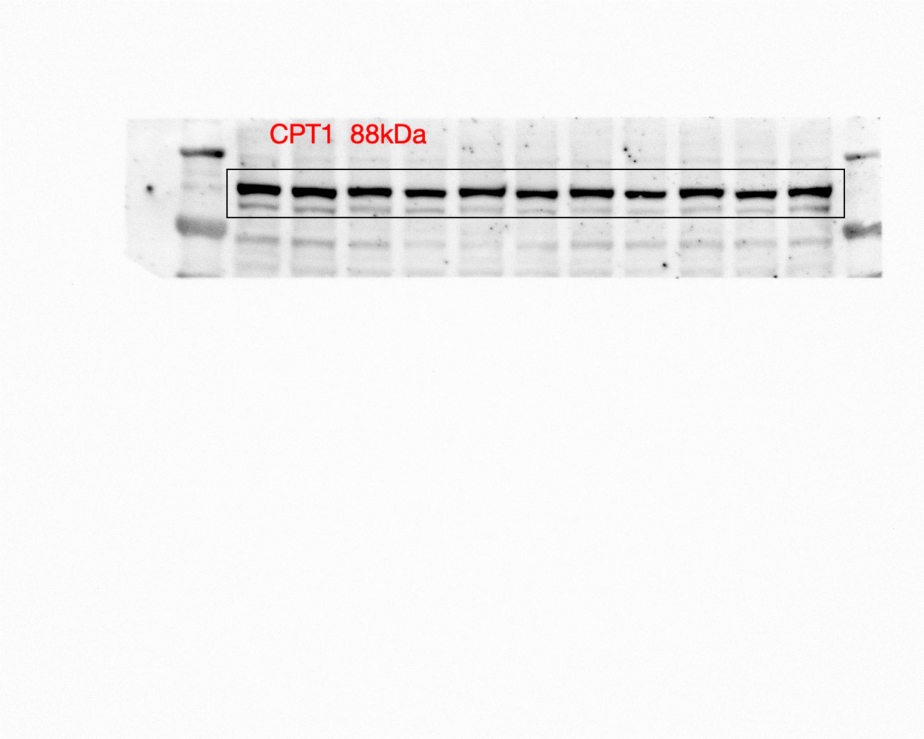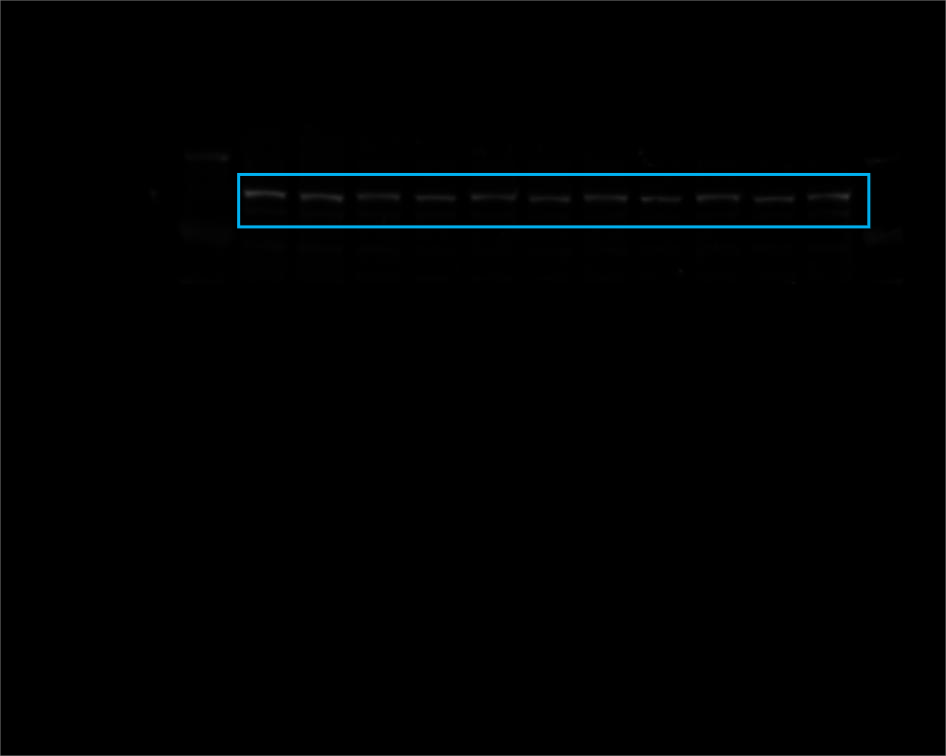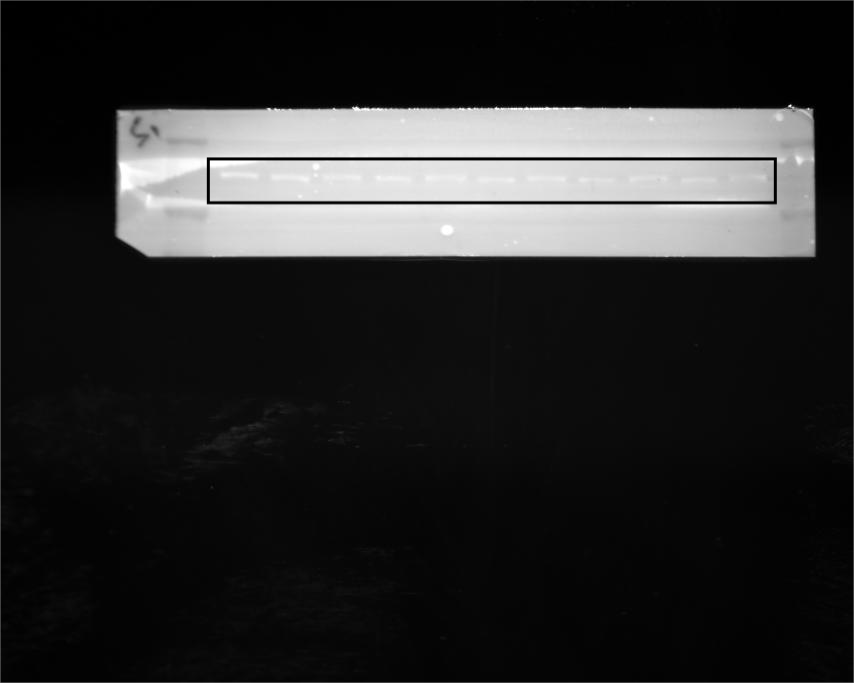 |
| 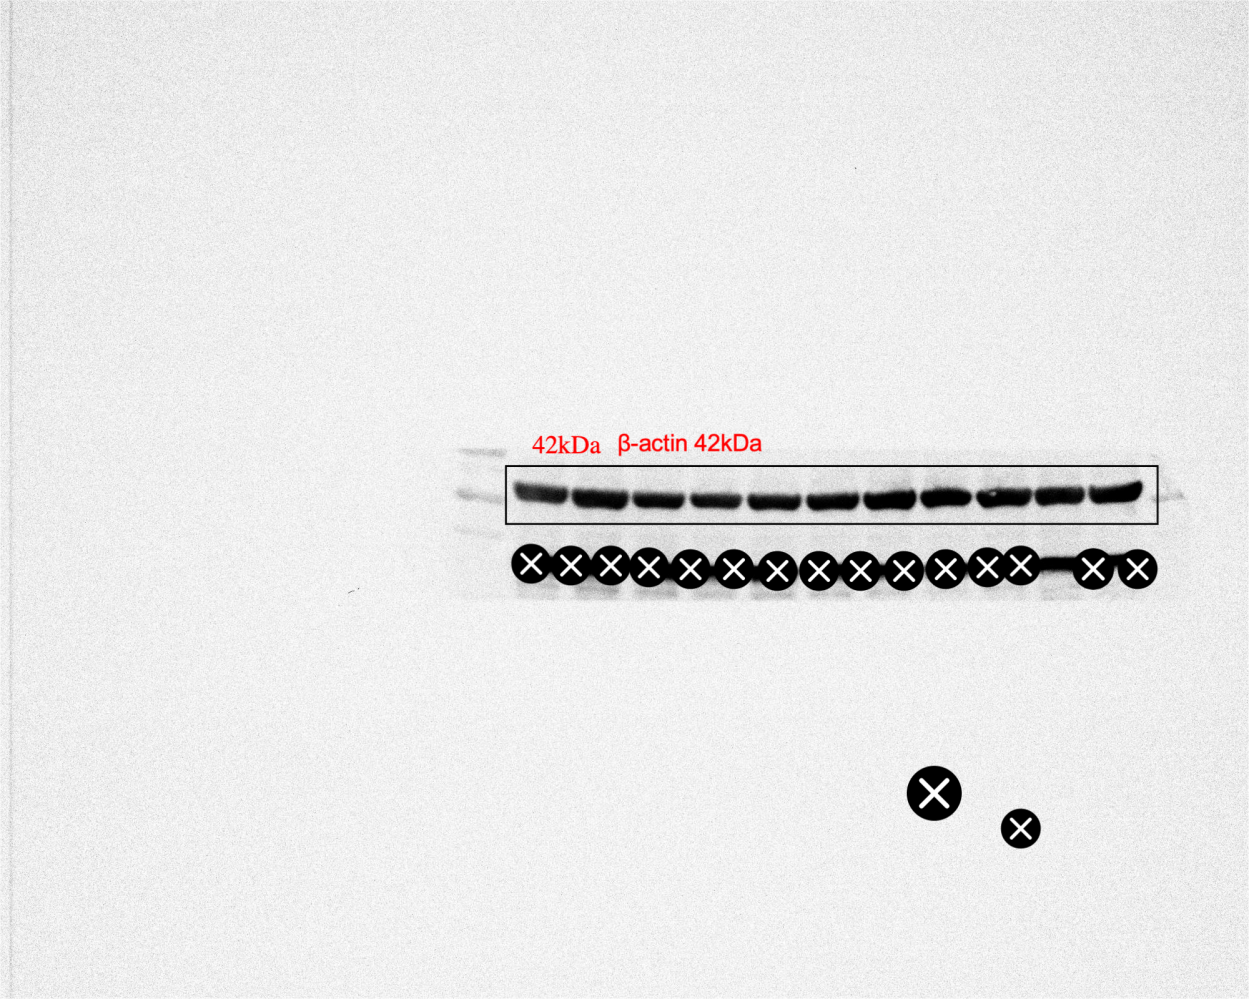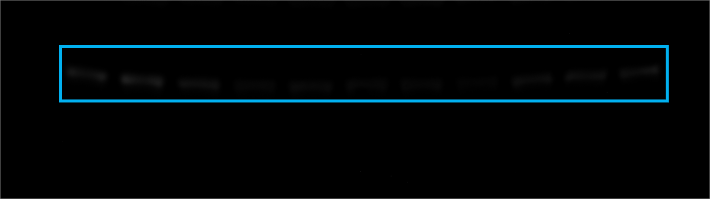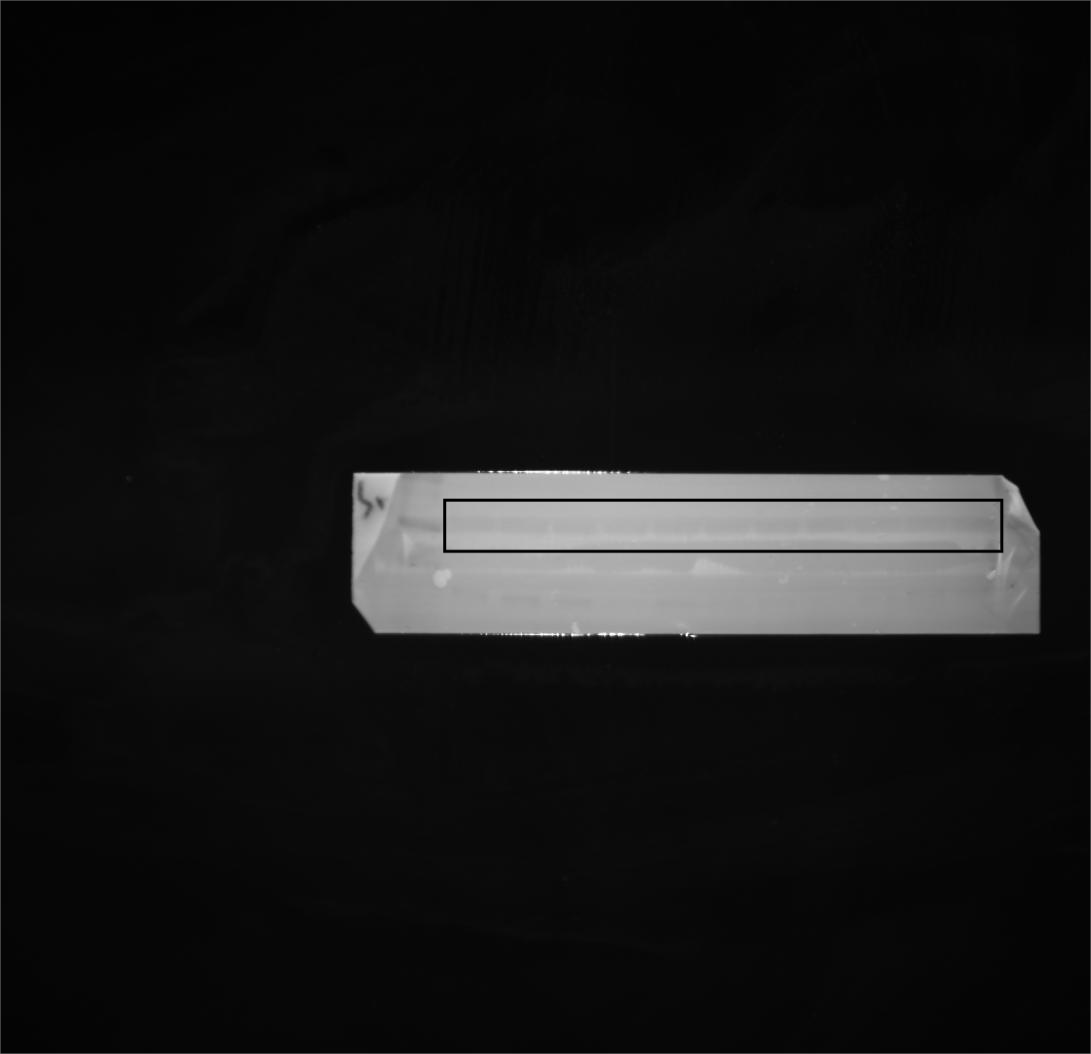 |
| Cropped blots in manuscript (Fig. 5 a) | | |
| 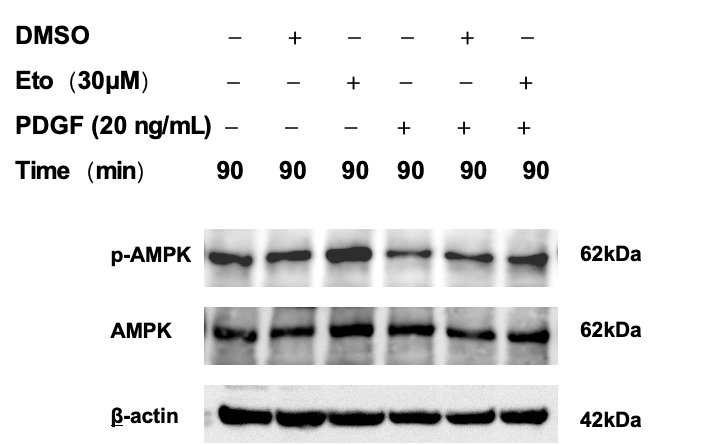 | | |
| Original blots in supplementary information (Fig. 5 a)  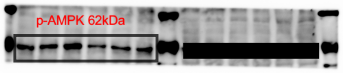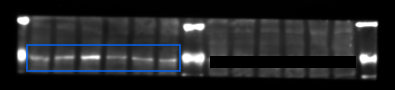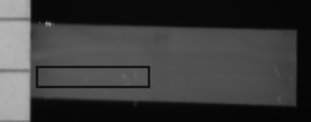  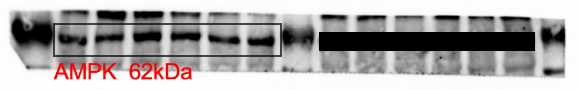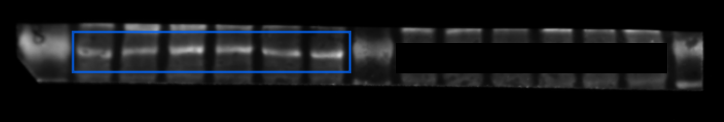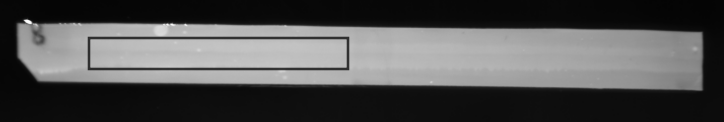  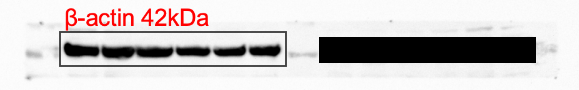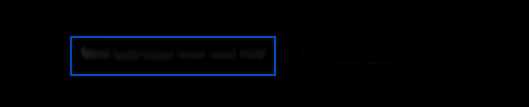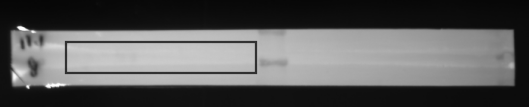 | | |

| Cropped blots in manuscript (Fig. 5 d) |
| --- |
| 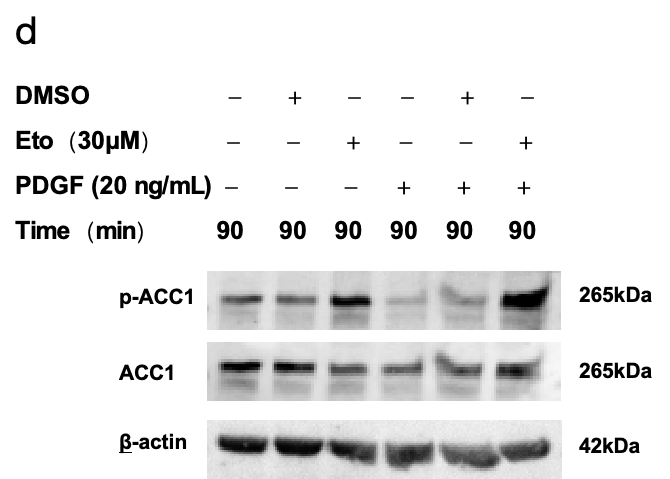 |
| Original blots in supplementary information (Fig. 5 d)  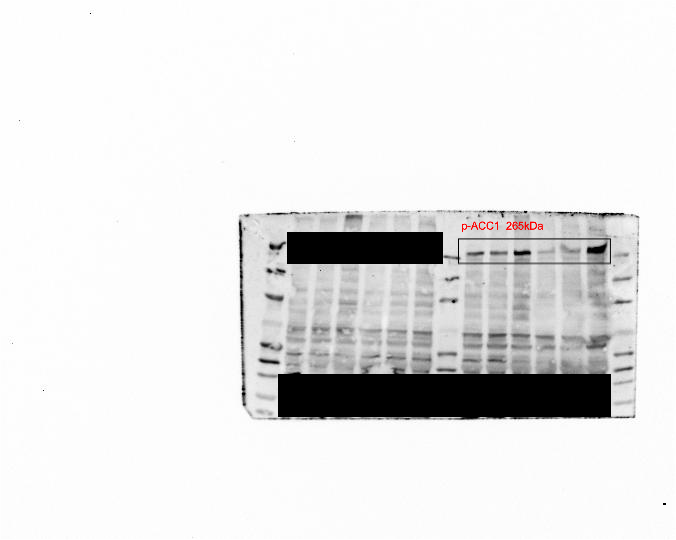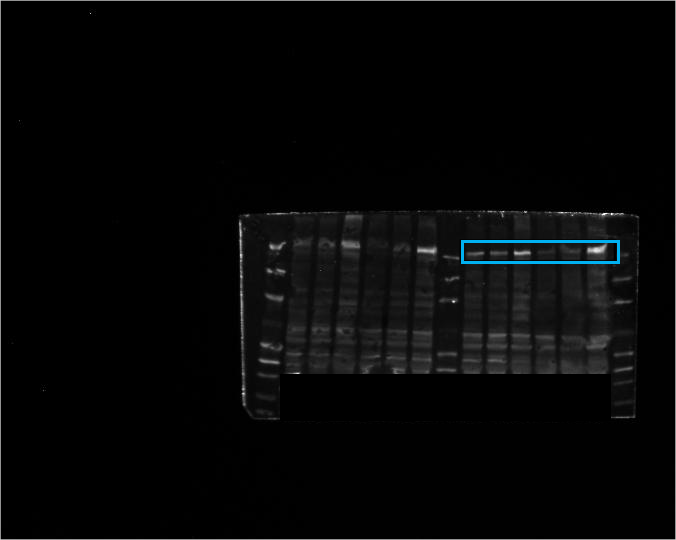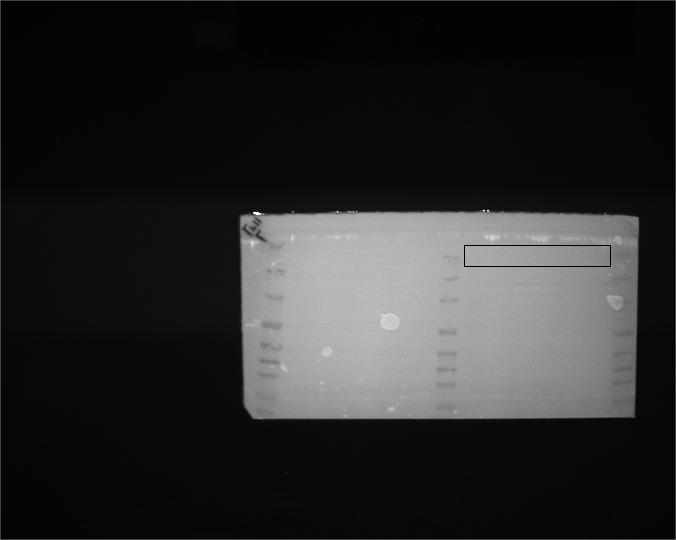  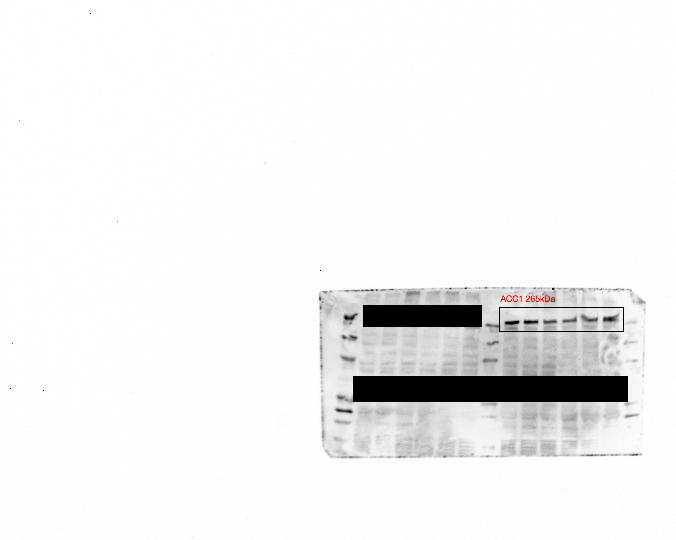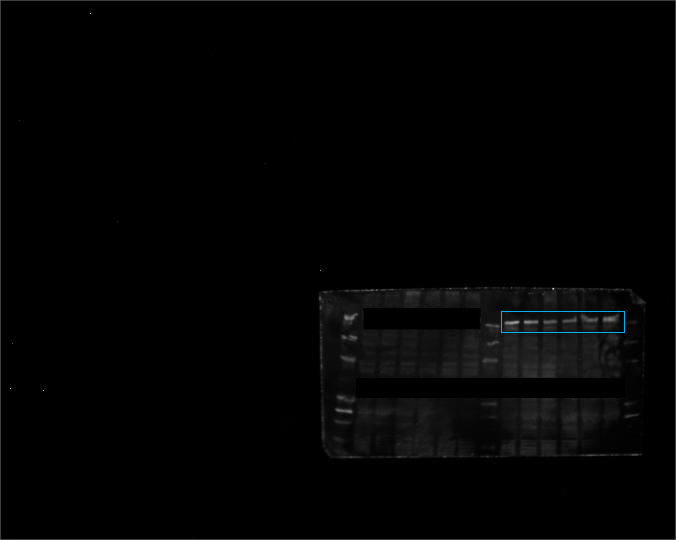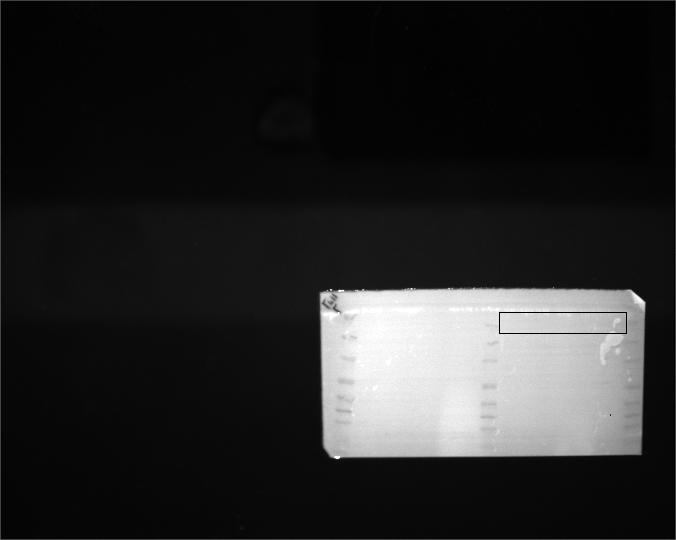  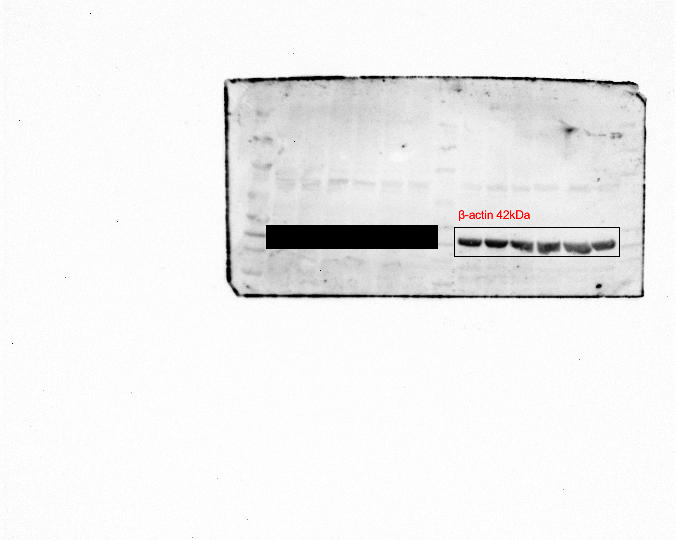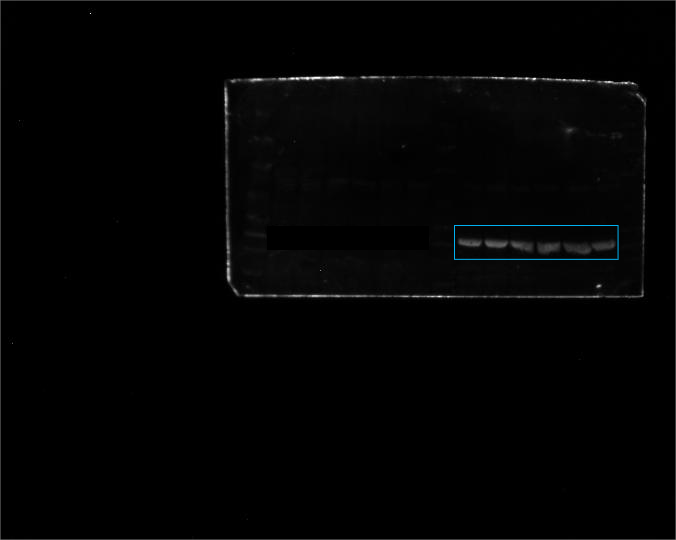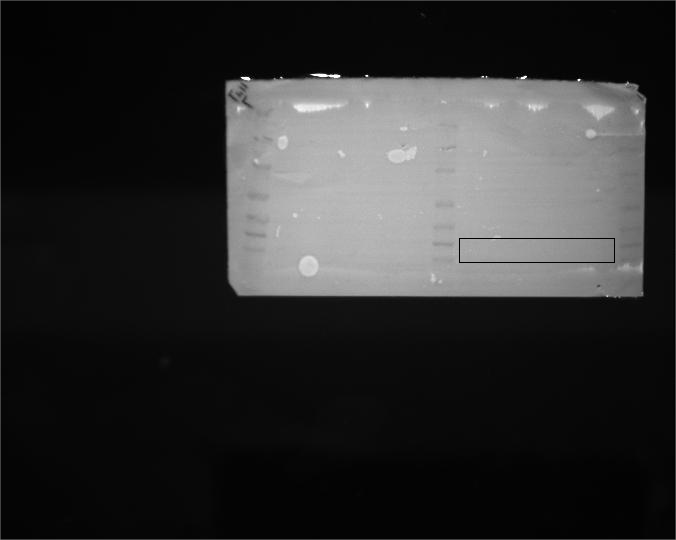 |

| Cropped blots in manuscript (Fig. 5 g) |
| --- |
| 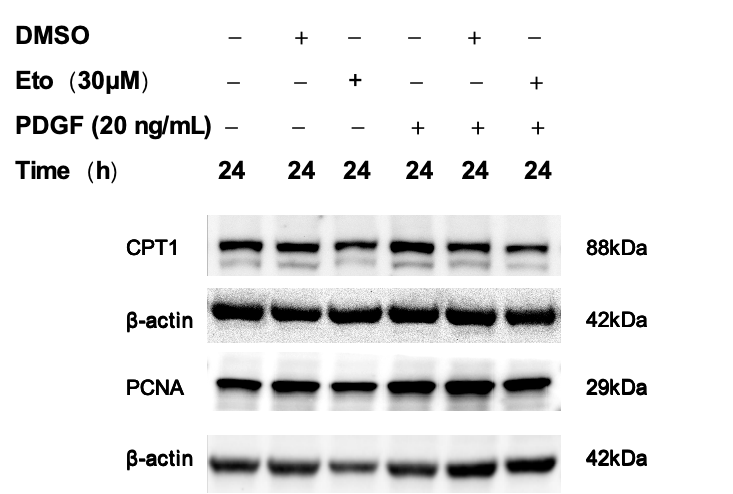 |
| Original blots in supplementary information (Fig. 5 g)  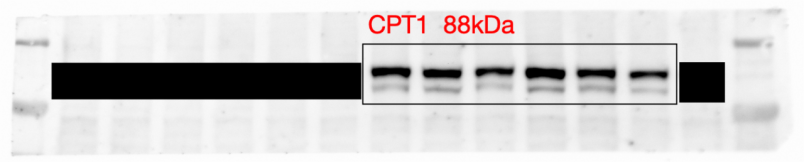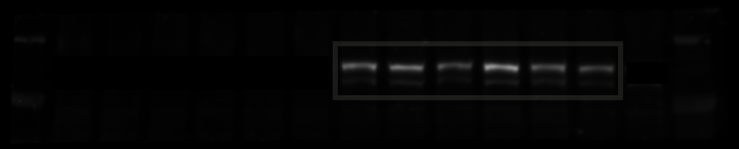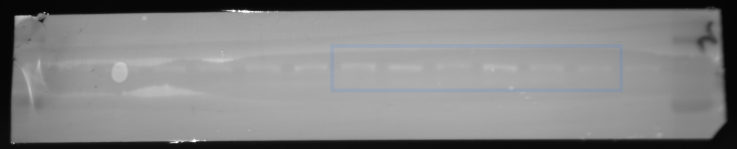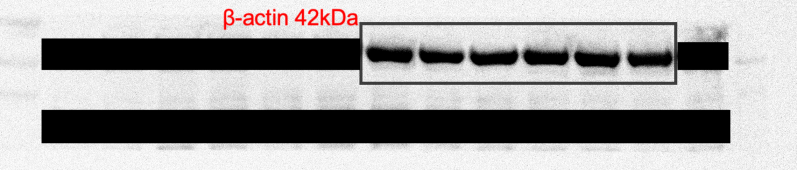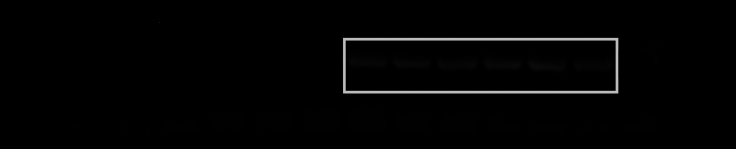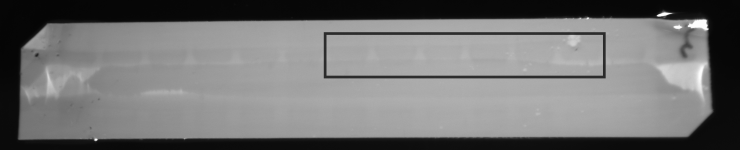  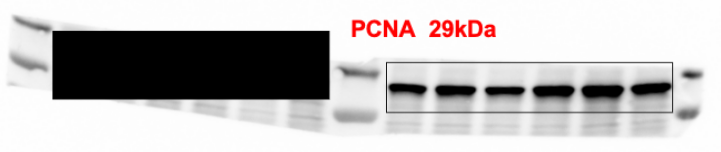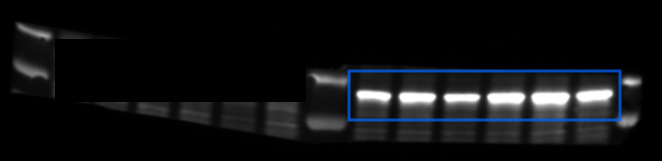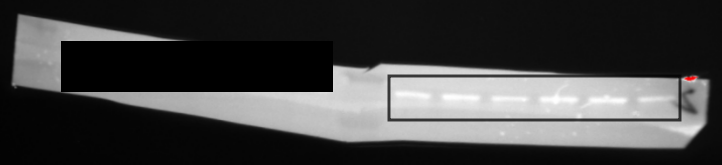  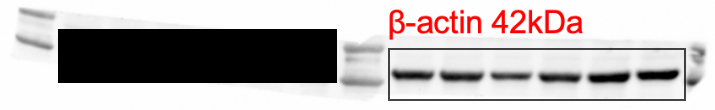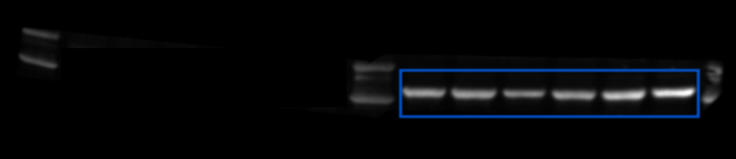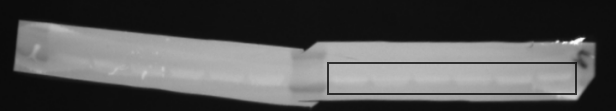 |

| Cropped blots in manuscript (Fig. 6 a) |
| --- |
| 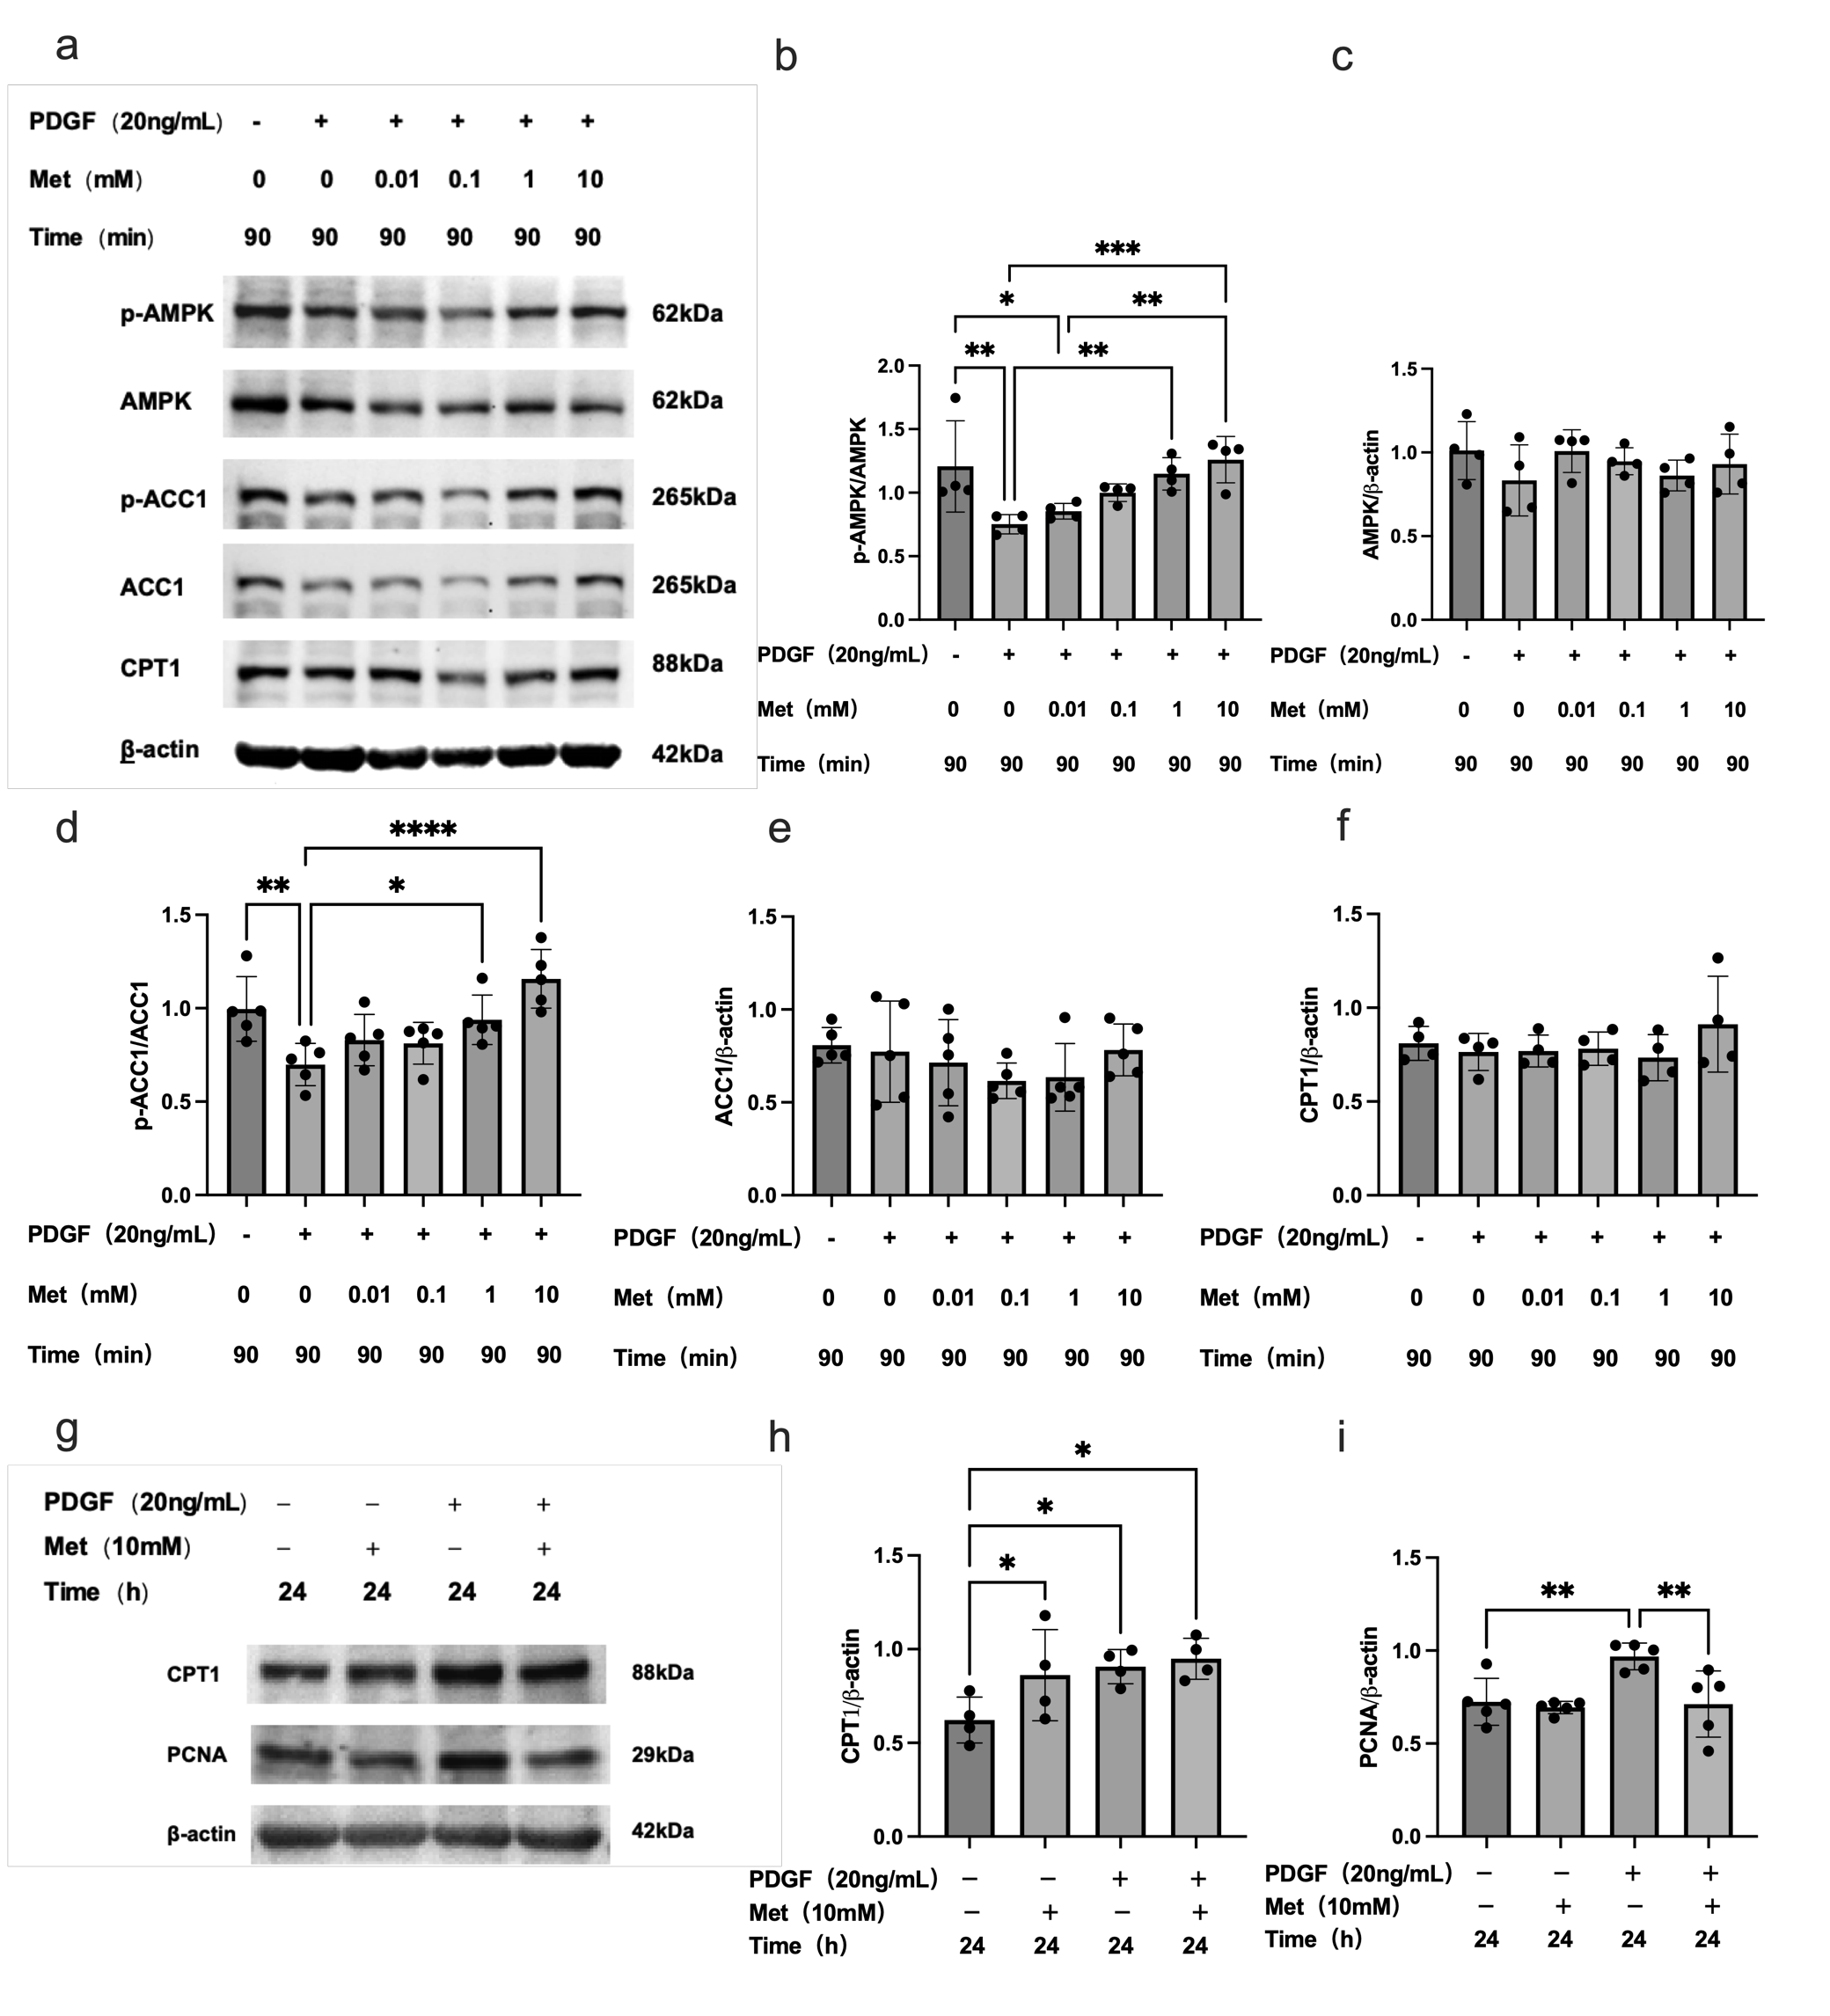 |
| Original blots in supplementary information (Fig. 6 a)  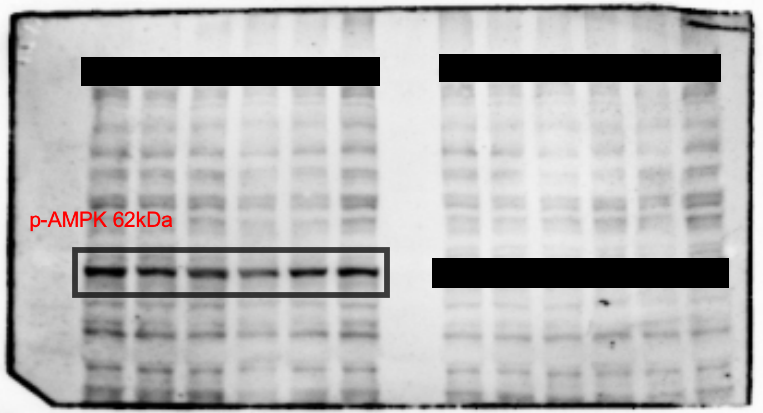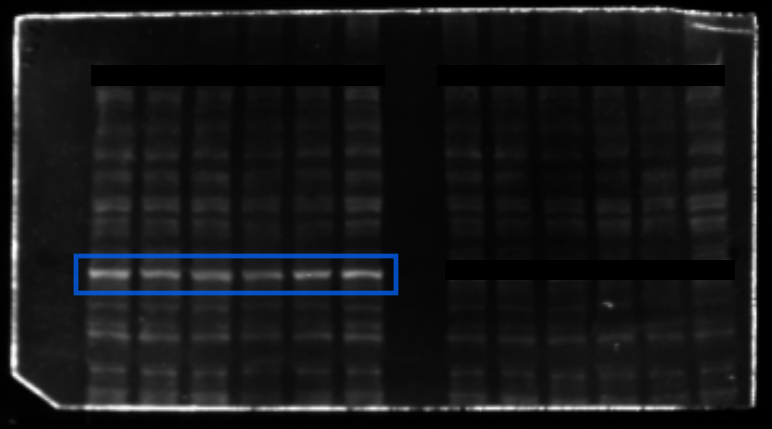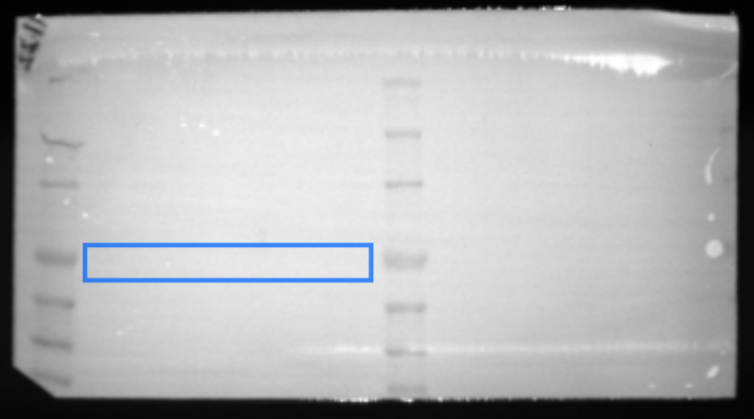  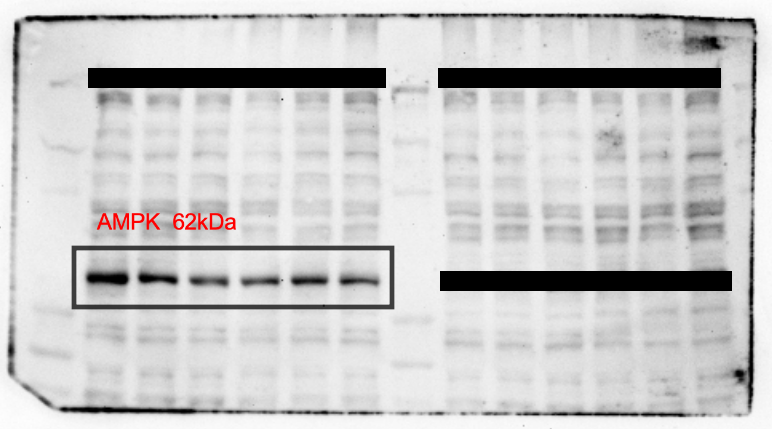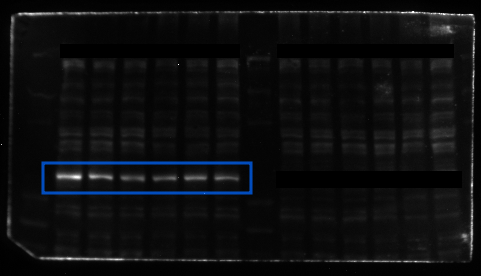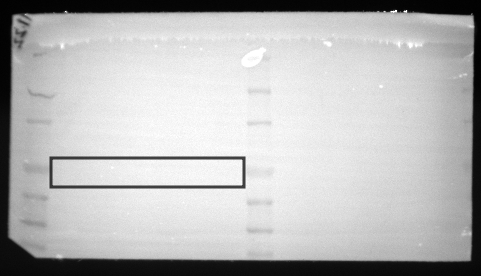  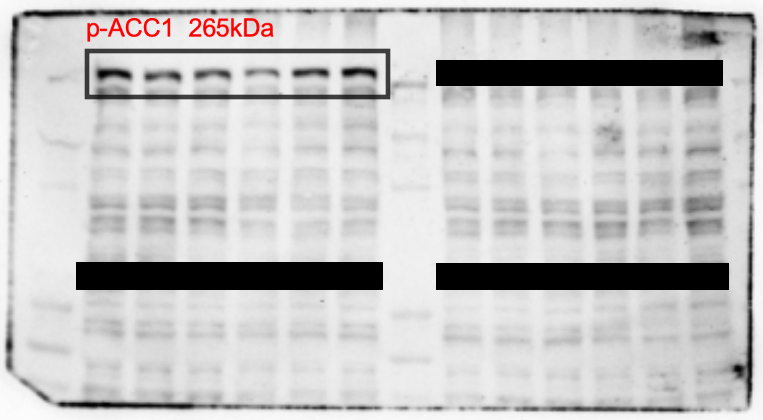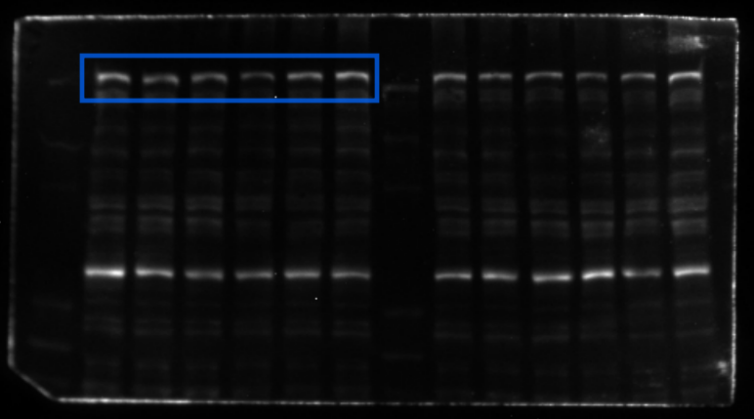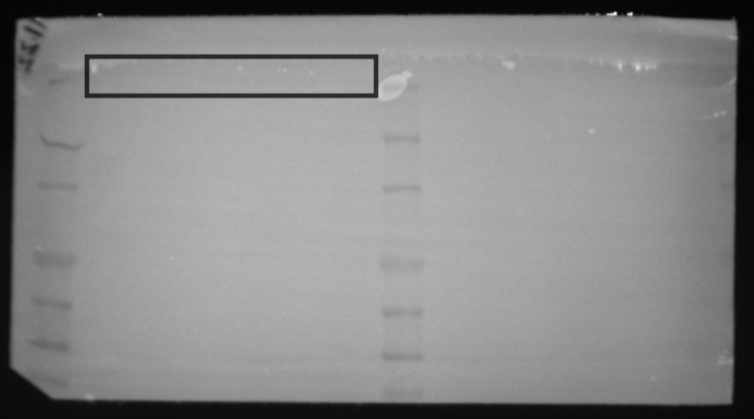 |
| Original blots in supplementary information (Fig. 6 a) |

| Cropped blots in manuscript (Fig. 6 g) |
| --- |
|  |
|  |

| Cropped blots in manuscript (Fig. 7 a) |
| --- |
|  |
| Original blots in supplementary information (Fig. 7 a) |

| Cropped blots in manuscript (Fig. 8 a) |
| --- |
|  |
| Original blots in supplementary information (Fig. 8 a) |

| Cropped blots in manuscript (Fig. 8 d) |
| --- |
|  |
| Original blots in supplementary information (Fig. 8 d)    Original blots in supplementary information (Fig. 8 d) |
|  |

| Cropped blots in manuscript (Fig. 8 g) |
| --- |
|  |
|  |

| Cropped blots in manuscript (Fig. 8 i) |
| --- |
|  |
|  |
